# Supplementary material for: Rapamycin Rescues ABT-737 Efficacy in Small Cell Lung Cancer
Source: Oxford University Press journal article supplement (doi:10.1158/0008-5472.can-13-3460), 2014-03-10
Supplement: 00085472can133460-sup-tabs1-4.xlsx [file 00085472can133460-sup-tabs1-4.xlsx]

## Sheet: Table of Contents
Supplemental Tables
Supplemental Table 1 - Tumor sample information; ABT-737 versus vehicle experiments
Supplemental Table 2 - ABT-737 Treatment Response - Genes
Supplemental Table 3 - ABT-737 Treatment - Gene Sets
Supplemental Table 4 - Connectivity Map output ranked list

## Sheet: S1 Tumor uArray ABT-737 vs. Con
Supplemental Table 1 - Tumor sample information; ABT-737 versus vehicle experiments
Mouse	Sex	Background	Age at PDX implanatation	Line	Treatment	Timepoint	Description
384	F	C.B-Igh-1b/IcrTac-Prkdcscid	4-6wks	LX47	ABT-737	D4	Reponding tumor (~1/2 between initial size and maximum response)
368	F	C.B-Igh-1b/IcrTac-Prkdcscid	4-6wks	LX47	ABT-737	D8	Time of maximal response
370	F	C.B-Igh-1b/IcrTac-Prkdcscid	4-6wks	LX47	ABT-737	D8	Time of maximal response
377	F	C.B-Igh-1b/IcrTac-Prkdcscid	4-6wks	LX47	ABT-737	D8	Time of maximal response
376	F	C.B-Igh-1b/IcrTac-Prkdcscid	4-6wks	LX47	Control	D4	Matched control for D4 ABT-737 tumors
378	F	C.B-Igh-1b/IcrTac-Prkdcscid	4-6wks	LX47	Control	D8	Matched control for D8 ABT-737 tumors
380	F	C.B-Igh-1b/IcrTac-Prkdcscid	4-6wks	LX47	Control	D8	Matched control for D8 ABT-737 tumors
840	F	C.B-Igh-1b/IcrTac-Prkdcscid	4-6wks	LX48	ABT-737	D12	Time of maximal response
844	F	C.B-Igh-1b/IcrTac-Prkdcscid	4-6wks	LX48	ABT-737	D12	Time of maximal response
906	F	C.B-Igh-1b/IcrTac-Prkdcscid	4-6wks	LX48	ABT-737	D12	Time of maximal response
914	F	C.B-Igh-1b/IcrTac-Prkdcscid	4-6wks	LX48	ABT-737	D12	Time of maximal response
829	F	C.B-Igh-1b/IcrTac-Prkdcscid	4-6wks	LX48	Control	D12	Matched control for D12 ABT-737-treated tumor
831	F	C.B-Igh-1b/IcrTac-Prkdcscid	4-6wks	LX48	Control	D12	Matched control for D12 ABT-737-treated tumor
912	F	C.B-Igh-1b/IcrTac-Prkdcscid	4-6wks	LX48	Control	D12	Matched control for D12 ABT-737-treated tumor
916	F	C.B-Igh-1b/IcrTac-Prkdcscid	4-6wks	LX48	Control	D12	Matched control for D12 ABT-737-treated tumor

## Sheet: S2 ABT-737 Genes
Supplemental Table 2 - ABT-737 Treatment Response - Genes
ID	logFC	AveExpr	t	P.Value	adj.P.Val	B
LDHA	-0.691749	11.8195	-8.01858	5.24607e-07	0.0248192	3.36547
ALDOA	-0.719059	10.634	-7.20727	2.04468e-06	0.0398159	2.69702
ZNF581	-0.428344	8.33146	-7.03262	2.77182e-06	0.0398159	2.53971
VEGFA	-0.728518	7.21964	-6.92229	3.36639e-06	0.0398159	2.43776
SLC16A3	-0.518323	6.82036	-6.72658	4.77143e-06	0.0430933	2.25189
PGK1	-0.536355	10.9108	-6.65119	5.46522e-06	0.0430933	2.17855
TIGA1	-0.72013	9.29444	-6.42857	8.1975e-06	0.0486026	1.95625
ADM	-1.28253	8.88637	-6.42717	8.21858e-06	0.0486026	1.95482
HPCAL1	-0.293977	9.40255	-6.22794	1.18819e-05	0.0624592	1.74843
ZNF395	-0.485875	9.58487	-6.07763	1.57479e-05	0.0681882	1.58801
SCARB1	-0.880339	7.80886	-6.07406	1.58544e-05	0.0681882	1.58414
LDHA	-0.768324	11.5101	-5.71778	3.12961e-05	0.123385	1.18729
BNIP3L	-0.497115	8.58552	-5.62883	3.71853e-05	0.135326	1.08459
TIMP2	1.32624	7.68041	5.54553	4.37422e-05	0.14336	0.987094
TRIB3	-0.627805	7.61009	-5.50176	4.7656e-05	0.14336	0.935356
NDUFA4L2	-1.54109	8.20817	-5.49298	4.84838e-05	0.14336	0.924935
FOS	-1.00524	7.37721	-5.38776	5.96412e-05	0.148399	0.79896
APOE	2.53587	10.7485	5.37597	6.10472e-05	0.148399	0.784715
LOC652726	-0.48571	8.36848	-5.36499	6.23871e-05	0.148399	0.771429
SLC2A1	-1.0928	9.94073	-5.36218	6.27348e-05	0.148399	0.768026
RNU1F1	-1.08832	9.18699	-5.32262	6.78485e-05	0.152853	0.719954
DDIT3	-0.728818	7.98746	-5.29666	7.14353e-05	0.153618	0.688262
PNCK	-0.280502	6.60934	-5.24286	7.95056e-05	0.157533	0.622187
GAPDHL6	1.88776	9.28359	5.24028	7.99154e-05	0.157533	0.619005
FTL	0.834375	13.3793	5.21228	8.45074e-05	0.159922	0.584387
SC4MOL	-0.45393	8.44349	-5.17999	9.014e-05	0.16402	0.544305
LOC647357	-0.229424	7.02641	-5.10031	0.000105758	0.183786	0.444576
ABCA1	1.17065	7.12043	5.08633	0.000108772	0.183786	0.426967
PSMA4	0.211959	10.6258	5.01352	0.000125968	0.189145	0.334668
CXCR4	-1.07044	8.74306	-5.01078	0.000126666	0.189145	0.331183
SNHG7	-0.461128	9.52045	-5.00711	0.000127609	0.189145	0.326503
DDIT4	-1.40718	10.1638	-4.97448	0.000136316	0.189145	0.284795
PPP1R15A	-0.462195	8.86203	-4.97091	0.000137305	0.189145	0.280223
HSPA1B	-1.25669	9.8686	-4.9593	0.000140572	0.189145	0.265331
NCRNA00219	-0.792001	9.13268	-4.94396	0.000145011	0.189145	0.245623
HSPA6	-0.881015	7.31857	-4.93892	0.000146501	0.189145	0.239138
H19	-1.6782	8.83305	-4.93001	0.000149171	0.189145	0.227675
RPS6KA1	-0.315058	7.89061	-4.921	0.000151924	0.189145	0.216058
ATF3	-0.419213	7.67573	-4.88102	0.000164785	0.199897	0.164337
BHLHB2	-1.60112	8.53745	-4.78849	0.000199011	0.229332	0.0435904
PSME2	0.19649	10.1157	4.78829	0.000199092	0.229332	0.0433278
LOC643870	1.70424	9.00585	4.76679	0.000208043	0.229332	0.0150628
PMP22	1.50125	7.58443	4.76586	0.00020844	0.229332	0.0138382

## Sheet: S3 ABT-737 Gene Sets
Supplemental Table 3 - ABT-737 Treatment - Gene Sets
GS	SIZE	SOURCE	ES	NES	NOM p-val	FDR q-val	FWER p-val	Tag %	Gene %	Signal	FDR (median)	glob.p.val
GNF2_RAB7L1	32	http://www.broadinstitute.org/gsea/msigdb/cards/GNF2_RAB7L1	-0.61147	-2.0517	0	0.0046034	0.004	0.281	0.102	0.253	0	0.004
WIERENGA_STAT5A_TARGETS_GROUP1	133	http://www.broadinstitute.org/gsea/msigdb/cards/WIERENGA_STAT5A_TARGETS_GROUP1	-0.58572	-1.6416	0	0.03489	0.661	0.301	0.125	0.264	0.020407	0
SHAFFER_IRF4_TARGETS_IN_MYELOMA_VS_MATURE_B_LYMPHOCYTE	100	http://www.broadinstitute.org/gsea/msigdb/cards/SHAFFER_IRF4_TARGETS_IN_MYELOMA_VS_MATURE_B_LYMPHOCYTE	-0.56319	-1.6428	0	0.035016	0.658	0.29	0.101	0.261	0.020741	0
WINTER_HYPOXIA_METAGENE	234	http://www.broadinstitute.org/gsea/msigdb/cards/WINTER_HYPOXIA_METAGENE	-0.61176	-1.651	0	0.035145	0.625	0.265	0.0521	0.253	0.021415	0
HELLER_HDAC_TARGETS_SILENCED_BY_METHYLATION_DN	268	http://www.broadinstitute.org/gsea/msigdb/cards/HELLER_HDAC_TARGETS_SILENCED_BY_METHYLATION_DN	-0.53805	-1.6436	0	0.035169	0.657	0.272	0.0946	0.249	0.020984	0
KEGG_STEROID_BIOSYNTHESIS	16	http://www.broadinstitute.org/gsea/msigdb/cards/KEGG_STEROID_BIOSYNTHESIS	-0.77407	-1.6518	0.001992	0.035447	0.625	0.562	0.0746	0.521	0.021579	0
BIOCARTA_NGF_PATHWAY	18	http://www.broadinstitute.org/gsea/msigdb/cards/BIOCARTA_NGF_PATHWAY	-0.66795	-1.6438	0.002083	0.035668	0.657	0.333	0.111	0.296	0.021314	0
HEART_DEVELOPMENT	37	http://www.broadinstitute.org/gsea/msigdb/cards/HEART_DEVELOPMENT	-0.49252	-1.6524	0.008114	0.035869	0.624	0.324	0.181	0.266	0.021945	0
REACTOME_GLUCONEOGENESIS	32	http://www.broadinstitute.org/gsea/msigdb/cards/REACTOME_GLUCONEOGENESIS	-0.66656	-1.648	0.004098	0.035887	0.634	0.344	0.0331	0.333	0.021763	0
ELVIDGE_HYPOXIA_UP	166	http://www.broadinstitute.org/gsea/msigdb/cards/ELVIDGE_HYPOXIA_UP	-0.69536	-1.6732	0	0.036082	0.571	0.434	0.107	0.389	0.023985	0
GROSS_HYPOXIA_VIA_ELK3_ONLY_UP	33	http://www.broadinstitute.org/gsea/msigdb/cards/GROSS_HYPOXIA_VIA_ELK3_ONLY_UP	-0.66746	-1.6579	0.01057	0.036211	0.607	0.485	0.134	0.42	0.022564	0
FLOTHO_PEDIATRIC_ALL_THERAPY_RESPONSE_UP	53	http://www.broadinstitute.org/gsea/msigdb/cards/FLOTHO_PEDIATRIC_ALL_THERAPY_RESPONSE_UP	-0.58118	-1.6545	0	0.036234	0.614	0.358	0.111	0.319	0.022353	0
BIOCARTA_IL6_PATHWAY	22	http://www.broadinstitute.org/gsea/msigdb/cards/BIOCARTA_IL6_PATHWAY	-0.64319	-1.6439	0.004115	0.036252	0.656	0.364	0.111	0.323	0.021682	0
ELVIDGE_HYPOXIA_BY_DMOG_UP	126	http://www.broadinstitute.org/gsea/msigdb/cards/ELVIDGE_HYPOXIA_BY_DMOG_UP	-0.71961	-1.6556	0	0.036293	0.61	0.333	0.0376	0.322	0.0224	0
QI_HYPOXIA	133	http://www.broadinstitute.org/gsea/msigdb/cards/QI_HYPOXIA	-0.65194	-1.6525	0	0.036558	0.624	0.353	0.0832	0.325	0.022367	0
VARELA_ZMPSTE24_TARGETS_UP	40	http://www.broadinstitute.org/gsea/msigdb/cards/VARELA_ZMPSTE24_TARGETS_UP	-0.58802	-1.6446	0.00207	0.036641	0.653	0.325	0.0962	0.294	0.021948	0
THEODOROU_MAMMARY_TUMORIGENESIS	31	http://www.broadinstitute.org/gsea/msigdb/cards/THEODOROU_MAMMARY_TUMORIGENESIS	-0.47996	-1.6735	0.008147	0.036829	0.571	0.194	0.0741	0.179	0.024546	0
MOOTHA_GLUCONEOGENESIS	31	http://www.broadinstitute.org/gsea/msigdb/cards/MOOTHA_GLUCONEOGENESIS	-0.68032	-1.6582	0.002045	0.036896	0.607	0.355	0.0678	0.331	0.023034	0
ADDYA_ERYTHROID_DIFFERENTIATION_BY_HEMIN	71	http://www.broadinstitute.org/gsea/msigdb/cards/ADDYA_ERYTHROID_DIFFERENTIATION_BY_HEMIN	-0.58878	-1.636	0	0.037057	0.678	0.296	0.0708	0.275	0.02161	0
ELVIDGE_HIF1A_AND_HIF2A_TARGETS_DN	101	http://www.broadinstitute.org/gsea/msigdb/cards/ELVIDGE_HIF1A_AND_HIF2A_TARGETS_DN	-0.75498	-1.6597	0	0.037084	0.603	0.416	0.0793	0.384	0.023254	0
MARCINIAK_ER_STRESS_RESPONSE_VIA_CHOP	25	http://www.broadinstitute.org/gsea/msigdb/cards/MARCINIAK_ER_STRESS_RESPONSE_VIA_CHOP	-0.62488	-1.6645	0.007968	0.037183	0.585	0.4	0.127	0.349	0.023469	0
KRIEG_HYPOXIA_VIA_KDM3A	52	http://www.broadinstitute.org/gsea/msigdb/cards/KRIEG_HYPOXIA_VIA_KDM3A	-0.57854	-1.6615	0.004132	0.037207	0.598	0.25	0.0586	0.236	0.023157	0
WINTER_HYPOXIA_UP	86	http://www.broadinstitute.org/gsea/msigdb/cards/WINTER_HYPOXIA_UP	-0.69257	-1.6743	0	0.037395	0.57	0.256	0.0355	0.247	0.025149	0
PID_HIF2PATHWAY	33	http://www.broadinstitute.org/gsea/msigdb/cards/PID_HIF2PATHWAY	-0.65371	-1.6622	0.002032	0.037665	0.596	0.152	0.00465	0.151	0.023547	0
chr1p33	39	http://www.broadinstitute.org/gsea/msigdb/cards/chr1p33	-0.51303	-1.6651	0.002032	0.037874	0.585	0.359	0.151	0.305	0.023906	0
HARRIS_HYPOXIA	80	http://www.broadinstitute.org/gsea/msigdb/cards/HARRIS_HYPOXIA	-0.73868	-1.6748	0.00207	0.038051	0.568	0.362	0.0692	0.338	0.025791	0
MOOTHA_GLYCOLYSIS	21	http://www.broadinstitute.org/gsea/msigdb/cards/MOOTHA_GLYCOLYSIS	-0.73686	-1.6331	0.004057	0.038271	0.69	0.429	0.0678	0.4	0.023068	0
NOJIMA_SFRP2_TARGETS_UP	31	http://www.broadinstitute.org/gsea/msigdb/cards/NOJIMA_SFRP2_TARGETS_UP	-0.75765	-1.6766	0.002096	0.038392	0.562	0.355	0.0652	0.332	0.02605	0
KEGG_GLYCOLYSIS_GLUCONEOGENESIS	62	http://www.broadinstitute.org/gsea/msigdb/cards/KEGG_GLYCOLYSIS_GLUCONEOGENESIS	-0.59143	-1.6655	0	0.038604	0.585	0.29	0.0692	0.271	0.024475	0
BLUM_RESPONSE_TO_SALIRASIB_UP	243	http://www.broadinstitute.org/gsea/msigdb/cards/BLUM_RESPONSE_TO_SALIRASIB_UP	-0.50791	-1.6783	0	0.038736	0.556	0.321	0.112	0.287	0.026402	0
AMIT_EGF_RESPONSE_480_MCF10A	43	http://www.broadinstitute.org/gsea/msigdb/cards/AMIT_EGF_RESPONSE_480_MCF10A	-0.65305	-1.6788	0	0.039634	0.556	0.279	0.0828	0.256	0.027067	0
MODULE_522	32	http://www.broadinstitute.org/gsea/msigdb/cards/MODULE_522	-0.53372	-1.6788	0	0.040775	0.556	0.344	0.129	0.3	0.027824	0
KANG_FLUOROURACIL_RESISTANCE_DN	16	http://www.broadinstitute.org/gsea/msigdb/cards/KANG_FLUOROURACIL_RESISTANCE_DN	-0.91704	-1.7017	0	0.041172	0.478	0.375	0.0132	0.37	0	0
SCHAEFFER_PROSTATE_DEVELOPMENT_12HR_UP	114	http://www.broadinstitute.org/gsea/msigdb/cards/SCHAEFFER_PROSTATE_DEVELOPMENT_12HR_UP	-0.60013	-1.623	0	0.041236	0.73	0.272	0.0962	0.247	0.028712	0
BIOCARTA_MTA3_PATHWAY	18	http://www.broadinstitute.org/gsea/msigdb/cards/BIOCARTA_MTA3_PATHWAY	-0.68503	-1.7209	0.00207	0.041422	0.405	0.389	0.142	0.334	0	0
KLEIN_PRIMARY_EFFUSION_LYMPHOMA_UP	51	http://www.broadinstitute.org/gsea/msigdb/cards/KLEIN_PRIMARY_EFFUSION_LYMPHOMA_UP	-0.52795	-1.6246	0.002105	0.041491	0.723	0.216	0.0584	0.203	0.028365	0
KEGG_BLADDER_CANCER	42	http://www.broadinstitute.org/gsea/msigdb/cards/KEGG_BLADDER_CANCER	-0.57355	-1.6234	0.004167	0.041542	0.728	0.262	0.0666	0.245	0.028471	0
STEINER_ERYTHROCYTE_MEMBRANE_GENES	15	http://www.broadinstitute.org/gsea/msigdb/cards/STEINER_ERYTHROCYTE_MEMBRANE_GENES	-0.68251	-1.6793	0.01636	0.04168	0.553	0.333	0.049	0.317	0.028559	0
GROSS_HYPOXIA_VIA_HIF1A_DN	108	http://www.broadinstitute.org/gsea/msigdb/cards/GROSS_HYPOXIA_VIA_HIF1A_DN	-0.619	-1.6976	0	0.04171	0.491	0.333	0.111	0.297	0	0
NAGASHIMA_NRG1_SIGNALING_UP	172	http://www.broadinstitute.org/gsea/msigdb/cards/NAGASHIMA_NRG1_SIGNALING_UP	-0.58423	-1.6254	0.002132	0.041732	0.719	0.25	0.0674	0.234	0.028347	0
KASLER_HDAC7_TARGETS_1_DN	17	http://www.broadinstitute.org/gsea/msigdb/cards/KASLER_HDAC7_TARGETS_1_DN	-0.79998	-1.621	0.001996	0.041749	0.737	0.353	0.0304	0.342	0.029232	0
TIAN_TNF_SIGNALING_VIA_NFKB	28	http://www.broadinstitute.org/gsea/msigdb/cards/TIAN_TNF_SIGNALING_VIA_NFKB	-0.58358	-1.6082	0	0.041854	0.767	0.25	0.0405	0.24	0.031588	0
BIOCARTA_EPO_PATHWAY	19	http://www.broadinstitute.org/gsea/msigdb/cards/BIOCARTA_EPO_PATHWAY	-0.66157	-1.6162	0.006073	0.042088	0.751	0.421	0.111	0.374	0.03131	0
MENSE_HYPOXIA_UP	89	http://www.broadinstitute.org/gsea/msigdb/cards/MENSE_HYPOXIA_UP	-0.73188	-1.6181	0.002083	0.042123	0.745	0.337	0.0252	0.33	0.030632	0
BIOCARTA_CCR5_PATHWAY	17	http://www.broadinstitute.org/gsea/msigdb/cards/BIOCARTA_CCR5_PATHWAY	-0.71216	-1.6173	0.00625	0.042201	0.747	0.294	0.0843	0.269	0.031466	0
KEGG_FRUCTOSE_AND_MANNOSE_METABOLISM	34	http://www.broadinstitute.org/gsea/msigdb/cards/KEGG_FRUCTOSE_AND_MANNOSE_METABOLISM	-0.7261	-1.6188	0.002041	0.042237	0.744	0.324	0.0762	0.299	0.030176	0
NIKOLSKY_BREAST_CANCER_5P15_AMPLICON	26	http://www.broadinstitute.org/gsea/msigdb/cards/NIKOLSKY_BREAST_CANCER_5P15_AMPLICON	-0.62189	-1.6092	0.009728	0.042316	0.767	0.5	0.187	0.407	0.031392	0
KRIGE_AMINO_ACID_DEPRIVATION	29	http://www.broadinstitute.org/gsea/msigdb/cards/KRIGE_AMINO_ACID_DEPRIVATION	-0.85574	-1.6083	0.003945	0.042356	0.767	0.552	0.0545	0.522	0.03187	0
GROSS_HIF1A_TARGETS_DN	25	http://www.broadinstitute.org/gsea/msigdb/cards/GROSS_HIF1A_TARGETS_DN	-0.76393	-1.6102	0	0.042408	0.766	0.44	0.0775	0.406	0.031481	0
BIOCARTA_TPO_PATHWAY	24	http://www.broadinstitute.org/gsea/msigdb/cards/BIOCARTA_TPO_PATHWAY	-0.6017	-1.611	0.002053	0.042546	0.764	0.208	0.0337	0.201	0.031749	0
MODULE_382	28	http://www.broadinstitute.org/gsea/msigdb/cards/MODULE_382	-0.74348	-1.6799	0	0.042577	0.552	0.143	0.00283	0.143	0.029414	0
GARGALOVIC_RESPONSE_TO_OXIDIZED_PHOSPHOLIPIDS_TURQUOISE_UP	77	http://www.broadinstitute.org/gsea/msigdb/cards/GARGALOVIC_RESPONSE_TO_OXIDIZED_PHOSPHOLIPIDS_TURQUOISE_UP	-0.55203	-1.7019	0	0.042764	0.478	0.39	0.125	0.342	0	0
PEDERSEN_TARGETS_OF_611CTF_ISOFORM_OF_ERBB2	75	http://www.broadinstitute.org/gsea/msigdb/cards/PEDERSEN_TARGETS_OF_611CTF_ISOFORM_OF_ERBB2	-0.49186	-1.6113	0.002049	0.042981	0.763	0.32	0.142	0.275	0.032125	0
WANG_NEOPLASTIC_TRANSFORMATION_BY_CCND1_MYC	21	http://www.broadinstitute.org/gsea/msigdb/cards/WANG_NEOPLASTIC_TRANSFORMATION_BY_CCND1_MYC	-0.7504	-1.6038	0	0.043031	0.777	0.524	0.144	0.448	0.031939	0
REACTOME_CHOLESTEROL_BIOSYNTHESIS	23	http://www.broadinstitute.org/gsea/msigdb/cards/REACTOME_CHOLESTEROL_BIOSYNTHESIS	-0.74257	-1.6029	0.01443	0.043128	0.78	0.652	0.137	0.563	0.031719	0
PARK_TRETINOIN_RESPONSE_AND_PML_RARA_FUSION	30	http://www.broadinstitute.org/gsea/msigdb/cards/PARK_TRETINOIN_RESPONSE_AND_PML_RARA_FUSION	-0.64967	-1.7217	0.002037	0.0432	0.403	0.367	0.112	0.326	0	0
RASHI_RESPONSE_TO_IONIZING_RADIATION_1	44	http://www.broadinstitute.org/gsea/msigdb/cards/RASHI_RESPONSE_TO_IONIZING_RADIATION_1	-0.65345	-1.6812	0	0.04333	0.549	0.295	0.0411	0.284	0.030306	0
MOREIRA_RESPONSE_TO_TSA_UP	28	http://www.broadinstitute.org/gsea/msigdb/cards/MOREIRA_RESPONSE_TO_TSA_UP	-0.66765	-1.6042	0.001992	0.043394	0.776	0.464	0.165	0.388	0.032018	0
EXONUCLEASE_ACTIVITY	19	http://www.broadinstitute.org/gsea/msigdb/cards/EXONUCLEASE_ACTIVITY	-0.59972	-1.6923	0.01449	0.0434	0.515	0.474	0.163	0.397	0.031646	0
FARDIN_HYPOXIA_11	28	http://www.broadinstitute.org/gsea/msigdb/cards/FARDIN_HYPOXIA_11	-0.8734	-1.6115	0	0.043466	0.763	0.571	0.0278	0.556	0.032519	0
BIOCARTA_ATM_PATHWAY	20	http://www.broadinstitute.org/gsea/msigdb/cards/BIOCARTA_ATM_PATHWAY	-0.59026	-1.6119	0.006135	0.043863	0.763	0.65	0.225	0.504	0.032862	0
NAGASHIMA_EGF_SIGNALING_UP	56	http://www.broadinstitute.org/gsea/msigdb/cards/NAGASHIMA_EGF_SIGNALING_UP	-0.623	-1.7028	0	0.044104	0.471	0.446	0.125	0.391	0	0
DAZARD_UV_RESPONSE_CLUSTER_G28	20	http://www.broadinstitute.org/gsea/msigdb/cards/DAZARD_UV_RESPONSE_CLUSTER_G28	-0.76627	-1.6813	0.004132	0.044588	0.549	0.4	0.0405	0.384	0.031316	0
PID_HIF1_TFPATHWAY	64	http://www.broadinstitute.org/gsea/msigdb/cards/PID_HIF1_TFPATHWAY	-0.78362	-1.6866	0	0.044679	0.531	0.281	0.0183	0.277	0.032517	0
ELVIDGE_HIF1A_TARGETS_DN	89	http://www.broadinstitute.org/gsea/msigdb/cards/ELVIDGE_HIF1A_TARGETS_DN	-0.76917	-1.6826	0	0.045308	0.542	0.427	0.0793	0.394	0.032229	0
BIOCARTA_TALL1_PATHWAY	15	http://www.broadinstitute.org/gsea/msigdb/cards/BIOCARTA_TALL1_PATHWAY	-0.52945	-1.7221	0.001969	0.045555	0.402	0.333	0.15	0.284	0	0
ORGANIC_ACID_TRANSPORT	42	http://www.broadinstitute.org/gsea/msigdb/cards/ORGANIC_ACID_TRANSPORT	-0.52765	-1.7035	0	0.045564	0.47	0.286	0.125	0.25	0	0
KIM_PTEN_TARGETS_UP	18	http://www.broadinstitute.org/gsea/msigdb/cards/KIM_PTEN_TARGETS_UP	-0.58058	-1.5924	0.01471	0.045893	0.809	0.556	0.247	0.418	0.033107	0
SHAFFER_IRF4_TARGETS_IN_PLASMA_CELL_VS_MATURE_B_LYMPHOCYTE	67	http://www.broadinstitute.org/gsea/msigdb/cards/SHAFFER_IRF4_TARGETS_IN_PLASMA_CELL_VS_MATURE_B_LYMPHOCYTE	-0.64679	-1.5934	0.003937	0.045894	0.807	0.418	0.128	0.365	0.033205	0
TING_SILENCED_BY_DICER	30	http://www.broadinstitute.org/gsea/msigdb/cards/TING_SILENCED_BY_DICER	-0.63817	-1.5935	0.004237	0.046319	0.807	0.233	0.0387	0.225	0.033583	0
FARMER_BREAST_CANCER_CLUSTER_4	16	http://www.broadinstitute.org/gsea/msigdb/cards/FARMER_BREAST_CANCER_CLUSTER_4	-0.7413	-1.5938	0.008386	0.046652	0.807	0.438	0.119	0.386	0.0337	0
COATES_MACROPHAGE_M1_VS_M2_DN	75	http://www.broadinstitute.org/gsea/msigdb/cards/COATES_MACROPHAGE_M1_VS_M2_DN	-0.65937	-1.7252	0.004073	0.046675	0.392	0.32	0.0991	0.289	0	0
PID_IL27PATHWAY	26	http://www.broadinstitute.org/gsea/msigdb/cards/PID_IL27PATHWAY	-0.53913	-1.5945	0.005952	0.046769	0.806	0.154	0.037	0.148	0.034045	0
GAURNIER_PSMD4_TARGETS	73	http://www.broadinstitute.org/gsea/msigdb/cards/GAURNIER_PSMD4_TARGETS	-0.36374	-1.5951	0.03086	0.046938	0.805	0.384	0.285	0.275	0.033964	0
GNF2_MMP1	32	http://www.broadinstitute.org/gsea/msigdb/cards/GNF2_MMP1	-0.54909	-1.7091	0	0.047027	0.453	0.219	0.0747	0.203	0	0
HELLER_SILENCED_BY_METHYLATION_DN	102	http://www.broadinstitute.org/gsea/msigdb/cards/HELLER_SILENCED_BY_METHYLATION_DN	-0.63274	-1.7039	0	0.047537	0.469	0.235	0.0445	0.226	0	0
MAINA_VHL_TARGETS_DN	17	http://www.broadinstitute.org/gsea/msigdb/cards/MAINA_VHL_TARGETS_DN	-0.77469	-1.588	0.004219	0.047682	0.819	0.294	0.00875	0.292	0.036934	0
GROSS_HYPOXIA_VIA_ELK3_AND_HIF1A_UP	139	http://www.broadinstitute.org/gsea/msigdb/cards/GROSS_HYPOXIA_VIA_ELK3_AND_HIF1A_UP	-0.57148	-1.5884	0	0.047753	0.817	0.266	0.0773	0.247	0.036973	0
MACLACHLAN_BRCA1_TARGETS_UP	20	http://www.broadinstitute.org/gsea/msigdb/cards/MACLACHLAN_BRCA1_TARGETS_UP	-0.71329	-1.5864	0.004098	0.04807	0.824	0.35	0.0617	0.329	0.037461	0
SCHURINGA_STAT5A_TARGETS_UP	21	http://www.broadinstitute.org/gsea/msigdb/cards/SCHURINGA_STAT5A_TARGETS_UP	-0.56673	-1.584	0.00789	0.049118	0.829	0.143	0.0225	0.14	0.038727	0
SPIELMAN_LYMPHOBLAST_EUROPEAN_VS_ASIAN_2FC_DN	19	http://www.broadinstitute.org/gsea/msigdb/cards/SPIELMAN_LYMPHOBLAST_EUROPEAN_VS_ASIAN_2FC_DN	-0.65135	-1.7253	0.006186	0.049786	0.392	0.421	0.104	0.377	0	0
PACHER_TARGETS_OF_IGF1_AND_IGF2_UP	34	http://www.broadinstitute.org/gsea/msigdb/cards/PACHER_TARGETS_OF_IGF1_AND_IGF2_UP	-0.7919	-1.5806	0.003914	0.050519	0.836	0.412	0.0362	0.397	0.039786	0
SEMENZA_HIF1_TARGETS	36	http://www.broadinstitute.org/gsea/msigdb/cards/SEMENZA_HIF1_TARGETS	-0.84291	-1.5813	0.004184	0.050665	0.835	0.583	0.0756	0.54	0.040015	0
SHAFFER_IRF4_TARGETS_IN_ACTIVATED_B_LYMPHOCYTE	79	http://www.broadinstitute.org/gsea/msigdb/cards/SHAFFER_IRF4_TARGETS_IN_ACTIVATED_B_LYMPHOCYTE	-0.64572	-1.5703	0.008264	0.051009	0.859	0.367	0.089	0.335	0.03858	0
VOLTAGE_GATED_CALCIUM_CHANNEL_COMPLEX	15	http://www.broadinstitute.org/gsea/msigdb/cards/VOLTAGE_GATED_CALCIUM_CHANNEL_COMPLEX	-0.47834	-1.5781	0.01581	0.051162	0.84	0.333	0.103	0.299	0.040113	0
WIERENGA_STAT5A_TARGETS_UP	211	http://www.broadinstitute.org/gsea/msigdb/cards/WIERENGA_STAT5A_TARGETS_UP	-0.50212	-1.5703	0	0.051463	0.859	0.275	0.125	0.242	0.038938	0
VOLTAGE_GATED_CALCIUM_CHANNEL_ACTIVITY	18	http://www.broadinstitute.org/gsea/msigdb/cards/VOLTAGE_GATED_CALCIUM_CHANNEL_ACTIVITY	-0.45018	-1.5782	0.01364	0.051615	0.84	0.278	0.103	0.249	0.040427	0
SAKAI_TUMOR_INFILTRATING_MONOCYTES_UP	27	http://www.broadinstitute.org/gsea/msigdb/cards/SAKAI_TUMOR_INFILTRATING_MONOCYTES_UP	-0.5562	-1.576	0.006135	0.051645	0.846	0.222	0.101	0.2	0.040709	0
SHI_SPARC_TARGETS_UP	23	http://www.broadinstitute.org/gsea/msigdb/cards/SHI_SPARC_TARGETS_UP	-0.67381	-1.5743	0.004032	0.051674	0.852	0.217	0.0239	0.212	0.040173	0
WESTON_VEGFA_TARGETS_12HR	35	http://www.broadinstitute.org/gsea/msigdb/cards/WESTON_VEGFA_TARGETS_12HR	-0.51823	-1.5749	0.003945	0.051702	0.847	0.286	0.126	0.25	0.040505	0
RNA_CATABOLIC_PROCESS	23	http://www.broadinstitute.org/gsea/msigdb/cards/RNA_CATABOLIC_PROCESS	-0.61259	-1.5728	0.007968	0.05173	0.855	0.304	0.11	0.271	0.039971	0
TIEN_INTESTINE_PROBIOTICS_24HR_DN	207	http://www.broadinstitute.org/gsea/msigdb/cards/TIEN_INTESTINE_PROBIOTICS_24HR_DN	-0.53491	-1.5765	0	0.051764	0.844	0.348	0.111	0.311	0.040655	0
GOUYER_TATI_TARGETS_DN	17	http://www.broadinstitute.org/gsea/msigdb/cards/GOUYER_TATI_TARGETS_DN	-0.73773	-1.5572	0	0.051777	0.886	0.588	0.161	0.494	0.040427	0
MODULE_417	22	http://www.broadinstitute.org/gsea/msigdb/cards/MODULE_417	-0.53513	-1.5577	0.01408	0.051817	0.883	0.273	0.0829	0.25	0.040701	0
FERRARI_RESPONSE_TO_FENRETINIDE_UP	20	http://www.broadinstitute.org/gsea/msigdb/cards/FERRARI_RESPONSE_TO_FENRETINIDE_UP	-0.78956	-1.5705	0.003914	0.051855	0.859	0.45	0.0405	0.432	0.039301	0
PID_GLYPICAN_1PATHWAY	27	http://www.broadinstitute.org/gsea/msigdb/cards/PID_GLYPICAN_1PATHWAY	-0.60166	-1.5711	0.005736	0.051867	0.857	0.185	0.0751	0.171	0.039404	0
chr7q11	115	http://www.broadinstitute.org/gsea/msigdb/cards/chr7q11	-0.42292	-1.568	0	0.05198	0.864	0.304	0.131	0.265	0.039996	0
YAO_TEMPORAL_RESPONSE_TO_PROGESTERONE_CLUSTER_5	28	http://www.broadinstitute.org/gsea/msigdb/cards/YAO_TEMPORAL_RESPONSE_TO_PROGESTERONE_CLUSTER_5	-0.68776	-1.5579	0	0.0521	0.883	0.321	0.0434	0.308	0.041031	0
BURTON_ADIPOGENESIS_1	33	http://www.broadinstitute.org/gsea/msigdb/cards/BURTON_ADIPOGENESIS_1	-0.68743	-1.5601	0	0.05213	0.88	0.455	0.112	0.404	0.040918	0
RESPONSE_TO_HYPOXIA	28	http://www.broadinstitute.org/gsea/msigdb/cards/RESPONSE_TO_HYPOXIA	-0.76231	-1.5668	0	0.052148	0.864	0.321	0.0559	0.304	0.040832	0
SUBTIL_PROGESTIN_TARGETS	35	http://www.broadinstitute.org/gsea/msigdb/cards/SUBTIL_PROGESTIN_TARGETS	-0.62209	-1.5729	0	0.052232	0.855	0.286	0.0751	0.265	0.040359	0
MODULE_432	15	http://www.broadinstitute.org/gsea/msigdb/cards/MODULE_432	-0.81186	-1.5583	0.01833	0.052299	0.881	0.667	0.0498	0.634	0.041349	0
DAZARD_UV_RESPONSE_CLUSTER_G3	15	http://www.broadinstitute.org/gsea/msigdb/cards/DAZARD_UV_RESPONSE_CLUSTER_G3	-0.69123	-1.5589	0.01875	0.05233	0.88	0.133	0.0043	0.133	0.041174	0
BIOCARTA_EGF_PATHWAY	31	http://www.broadinstitute.org/gsea/msigdb/cards/BIOCARTA_EGF_PATHWAY	-0.58302	-1.5712	0.002032	0.052336	0.857	0.355	0.111	0.316	0.03978	0
CHUANG_OXIDATIVE_STRESS_RESPONSE_UP	27	http://www.broadinstitute.org/gsea/msigdb/cards/CHUANG_OXIDATIVE_STRESS_RESPONSE_UP	-0.70225	-1.5658	0	0.052371	0.867	0.222	0.0183	0.218	0.040815	0
GNF2_GLTSCR2	31	http://www.broadinstitute.org/gsea/msigdb/cards/GNF2_GLTSCR2	-0.57721	-1.5649	0.003937	0.052457	0.871	0.355	0.11	0.316	0.040826	0
CARBOXYLIC_ACID_TRANSPORT	41	http://www.broadinstitute.org/gsea/msigdb/cards/CARBOXYLIC_ACID_TRANSPORT	-0.54208	-1.7263	0	0.052535	0.387	0.293	0.125	0.256	0	0
HEDENFALK_BREAST_CANCER_BRACX_UP	19	http://www.broadinstitute.org/gsea/msigdb/cards/HEDENFALK_BREAST_CANCER_BRACX_UP	-0.76465	-1.5602	0	0.052539	0.88	0.474	0.0888	0.432	0.041262	0
REACTOME_AMINO_ACID_TRANSPORT_ACROSS_THE_PLASMA_MEMBRANE	31	http://www.broadinstitute.org/gsea/msigdb/cards/REACTOME_AMINO_ACID_TRANSPORT_ACROSS_THE_PLASMA_MEMBRANE	-0.49748	-1.5607	0	0.052808	0.88	0.194	0.0897	0.176	0.041443	0
KIM_HYPOXIA	24	http://www.broadinstitute.org/gsea/msigdb/cards/KIM_HYPOXIA	-0.78573	-1.5611	0.01059	0.05298	0.88	0.458	0.0639	0.429	0.041558	0
PID_P38ALPHABETADOWNSTREAMPATHWAY	38	http://www.broadinstitute.org/gsea/msigdb/cards/PID_P38ALPHABETADOWNSTREAMPATHWAY	-0.53827	-1.563	0.002053	0.05323	0.874	0.421	0.136	0.364	0.041487	0
PRAMOONJAGO_SOX4_TARGETS_UP	49	http://www.broadinstitute.org/gsea/msigdb/cards/PRAMOONJAGO_SOX4_TARGETS_UP	-0.74822	-1.5612	0	0.053301	0.88	0.551	0.103	0.495	0.041538	0
YIH_RESPONSE_TO_ARSENITE_C1	24	http://www.broadinstitute.org/gsea/msigdb/cards/YIH_RESPONSE_TO_ARSENITE_C1	-0.6568	-1.5619	0.002024	0.053348	0.876	0.458	0.108	0.409	0.041538	0
LEONARD_HYPOXIA	44	http://www.broadinstitute.org/gsea/msigdb/cards/LEONARD_HYPOXIA	-0.83604	-1.5536	0.00396	0.053794	0.898	0.5	0.0459	0.478	0.042478	0
THEILGAARD_NEUTROPHIL_AT_SKIN_WOUND_UP	76	http://www.broadinstitute.org/gsea/msigdb/cards/THEILGAARD_NEUTROPHIL_AT_SKIN_WOUND_UP	-0.52146	-1.7303	0	0.054195	0.374	0.316	0.111	0.281	0	0
PID_PDGFRAPATHWAY	22	http://www.broadinstitute.org/gsea/msigdb/cards/PID_PDGFRAPATHWAY	-0.58815	-1.5515	0.01033	0.054519	0.9	0.364	0.118	0.321	0.042934	0
SATO_SILENCED_BY_DEACETYLATION_IN_PANCREATIC_CANCER	48	http://www.broadinstitute.org/gsea/msigdb/cards/SATO_SILENCED_BY_DEACETYLATION_IN_PANCREATIC_CANCER	-0.5811	-1.5497	0.003945	0.054883	0.903	0.146	0.0245	0.142	0.04357	0
SARTIPY_BLUNTED_BY_INSULIN_RESISTANCE_DN	17	http://www.broadinstitute.org/gsea/msigdb/cards/SARTIPY_BLUNTED_BY_INSULIN_RESISTANCE_DN	-0.75697	-1.5489	0.0122	0.055073	0.904	0.294	0.0462	0.281	0.043747	0
LI_INDUCED_T_TO_NATURAL_KILLER_DN	113	http://www.broadinstitute.org/gsea/msigdb/cards/LI_INDUCED_T_TO_NATURAL_KILLER_DN	-0.55301	-1.5497	0	0.055286	0.903	0.274	0.0878	0.251	0.043785	0
PID_ATF2_PATHWAY	59	http://www.broadinstitute.org/gsea/msigdb/cards/PID_ATF2_PATHWAY	-0.57471	-1.7336	0	0.055775	0.362	0.373	0.127	0.326	0	0
REACTOME_GLYCOLYSIS	28	http://www.broadinstitute.org/gsea/msigdb/cards/REACTOME_GLYCOLYSIS	-0.73794	-1.543	0.004167	0.056356	0.912	0.357	0.0278	0.348	0.04575	0
JACKSON_DNMT1_TARGETS_DN	25	http://www.broadinstitute.org/gsea/msigdb/cards/JACKSON_DNMT1_TARGETS_DN	-0.70136	-1.543	0	0.056771	0.912	0.36	0.0802	0.331	0.046087	0
CAFFAREL_RESPONSE_TO_THC_UP	31	http://www.broadinstitute.org/gsea/msigdb/cards/CAFFAREL_RESPONSE_TO_THC_UP	-0.64927	-1.5431	0.01807	0.057167	0.912	0.258	0.06	0.243	0.046428	0
UEDA_CENTRAL_CLOCK	85	http://www.broadinstitute.org/gsea/msigdb/cards/UEDA_CENTRAL_CLOCK	-0.58441	-1.5448	0	0.057274	0.912	0.329	0.0962	0.299	0.046291	0
SKELETAL_MUSCLE_DEVELOPMENT	31	http://www.broadinstitute.org/gsea/msigdb/cards/SKELETAL_MUSCLE_DEVELOPMENT	-0.57074	-1.5437	0	0.057505	0.912	0.419	0.126	0.367	0.04654	0
DING_LUNG_CANCER_MUTATED_SIGNIFICANTLY	26	http://www.broadinstitute.org/gsea/msigdb/cards/DING_LUNG_CANCER_MUTATED_SIGNIFICANTLY	-0.51806	-1.5432	0.0214	0.057584	0.912	0.308	0.105	0.276	0.046775	0
LABBE_TARGETS_OF_TGFB1_AND_WNT3A_DN	107	http://www.broadinstitute.org/gsea/msigdb/cards/LABBE_TARGETS_OF_TGFB1_AND_WNT3A_DN	-0.49142	-1.545	0	0.057611	0.912	0.318	0.155	0.27	0.046626	0
KLEIN_TARGETS_OF_BCR_ABL1_FUSION	45	http://www.broadinstitute.org/gsea/msigdb/cards/KLEIN_TARGETS_OF_BCR_ABL1_FUSION	-0.45593	-1.7385	0	0.057759	0.347	0.222	0.126	0.194	0	0
KEGG_ALLOGRAFT_REJECTION	38	http://www.broadinstitute.org/gsea/msigdb/cards/KEGG_ALLOGRAFT_REJECTION	-0.35359	-1.5406	0.006224	0.057834	0.919	0.316	0.235	0.242	0.047526	0
SUH_COEXPRESSED_WITH_ID1_AND_ID2_UP	18	http://www.broadinstitute.org/gsea/msigdb/cards/SUH_COEXPRESSED_WITH_ID1_AND_ID2_UP	-0.69631	-1.5383	0.02204	0.058657	0.923	0.333	0.0269	0.325	0.04841	0
PID_IL6_7PATHWAY	47	http://www.broadinstitute.org/gsea/msigdb/cards/PID_IL6_7PATHWAY	-0.50956	-1.5388	0.002062	0.058691	0.921	0.17	0.0501	0.162	0.048473	0
YAMASHITA_LIVER_CANCER_STEM_CELL_UP	47	http://www.broadinstitute.org/gsea/msigdb/cards/YAMASHITA_LIVER_CANCER_STEM_CELL_UP	-0.53583	-1.5317	0.003992	0.059813	0.934	0.383	0.145	0.328	0.04812	0
CUI_TCF21_TARGETS_DN	30	http://www.broadinstitute.org/gsea/msigdb/cards/CUI_TCF21_TARGETS_DN	-0.64426	-1.532	0.01375	0.060002	0.934	0.2	0.0414	0.192	0.048272	0
ZHANG_PROLIFERATING_VS_QUIESCENT	51	http://www.broadinstitute.org/gsea/msigdb/cards/ZHANG_PROLIFERATING_VS_QUIESCENT	-0.51104	-1.5331	0.006061	0.060139	0.932	0.255	0.0524	0.242	0.048151	0
GLUCOSE_METABOLIC_PROCESS	28	http://www.broadinstitute.org/gsea/msigdb/cards/GLUCOSE_METABOLIC_PROCESS	-0.60551	-1.5354	0.01188	0.060293	0.929	0.393	0.158	0.331	0.04884	0
LIPOPROTEIN_BINDING	17	http://www.broadinstitute.org/gsea/msigdb/cards/LIPOPROTEIN_BINDING	-0.60585	-1.5321	0.006098	0.060332	0.934	0.176	0.0741	0.163	0.048541	0
GARGALOVIC_RESPONSE_TO_OXIDIZED_PHOSPHOLIPIDS_RED_UP	16	http://www.broadinstitute.org/gsea/msigdb/cards/GARGALOVIC_RESPONSE_TO_OXIDIZED_PHOSPHOLIPIDS_RED_UP	-0.81524	-1.5332	0.002008	0.060437	0.932	0.5	0.0307	0.485	0.048463	0
CONCANNON_APOPTOSIS_BY_EPOXOMICIN_UP	233	http://www.broadinstitute.org/gsea/msigdb/cards/CONCANNON_APOPTOSIS_BY_EPOXOMICIN_UP	-0.4725	-1.5303	0.001972	0.060578	0.937	0.258	0.0976	0.234	0.049605	0
MCCLUNG_CREB1_TARGETS_DN	57	http://www.broadinstitute.org/gsea/msigdb/cards/MCCLUNG_CREB1_TARGETS_DN	-0.51163	-1.5342	0	0.060658	0.932	0.281	0.0961	0.254	0.048903	0
MODULE_73	22	http://www.broadinstitute.org/gsea/msigdb/cards/MODULE_73	-0.57139	-1.5336	0.0241	0.060666	0.932	0.0455	0.000318	0.0455	0.048677	0
WANG_ADIPOGENIC_GENES_REPRESSED_BY_SIRT1	28	http://www.broadinstitute.org/gsea/msigdb/cards/WANG_ADIPOGENIC_GENES_REPRESSED_BY_SIRT1	-0.76675	-1.5293	0.02316	0.060821	0.94	0.357	0.0278	0.348	0.049762	0
KEGG_LEISHMANIA_INFECTION	70	http://www.broadinstitute.org/gsea/msigdb/cards/KEGG_LEISHMANIA_INFECTION	-0.41163	-1.5246	0	0.060859	0.949	0.214	0.128	0.187	0.049619	0
BILANGES_RAPAMYCIN_SENSITIVE_VIA_TSC1_AND_TSC2	69	http://www.broadinstitute.org/gsea/msigdb/cards/BILANGES_RAPAMYCIN_SENSITIVE_VIA_TSC1_AND_TSC2	-0.5518	-1.5241	0.001992	0.060896	0.951	0.362	0.095	0.329	0.049499	0
BIOCARTA_NKT_PATHWAY	29	http://www.broadinstitute.org/gsea/msigdb/cards/BIOCARTA_NKT_PATHWAY	-0.54245	-1.7496	0.002083	0.060913	0.321	0.483	0.283	0.346	0	0
SCHMIDT_POR_TARGETS_IN_LIMB_BUD_UP	25	http://www.broadinstitute.org/gsea/msigdb/cards/SCHMIDT_POR_TARGETS_IN_LIMB_BUD_UP	-0.69072	-1.5288	0.02049	0.060921	0.94	0.52	0.0975	0.47	0.049653	0
REACTOME_GLUCOSE_METABOLISM	66	http://www.broadinstitute.org/gsea/msigdb/cards/REACTOME_GLUCOSE_METABOLISM	-0.5748	-1.5248	0.004049	0.061142	0.949	0.242	0.0331	0.235	0.049678	0
NITROGEN_COMPOUND_BIOSYNTHETIC_PROCESS	25	http://www.broadinstitute.org/gsea/msigdb/cards/NITROGEN_COMPOUND_BIOSYNTHETIC_PROCESS	-0.4812	-1.525	0.01033	0.061323	0.949	0.24	0.0707	0.223	0.049765	0
DIRMEIER_LMP1_RESPONSE_EARLY	66	http://www.broadinstitute.org/gsea/msigdb/cards/DIRMEIER_LMP1_RESPONSE_EARLY	-0.43941	-1.5268	0	0.061456	0.943	0.288	0.136	0.249	0.050283	0
KEGG_LINOLEIC_ACID_METABOLISM	28	http://www.broadinstitute.org/gsea/msigdb/cards/KEGG_LINOLEIC_ACID_METABOLISM	-0.50725	-1.7411	0.005848	0.061472	0.341	0.143	0.0751	0.132	0	0
STEARMAN_TUMOR_FIELD_EFFECT_UP	36	http://www.broadinstitute.org/gsea/msigdb/cards/STEARMAN_TUMOR_FIELD_EFFECT_UP	-0.44743	-1.5262	0.01183	0.061622	0.944	0.389	0.158	0.328	0.050606	0
SHIPP_DLBCL_VS_FOLLICULAR_LYMPHOMA_UP	45	http://www.broadinstitute.org/gsea/msigdb/cards/SHIPP_DLBCL_VS_FOLLICULAR_LYMPHOMA_UP	-0.56366	-1.5226	0.002062	0.061676	0.954	0.378	0.113	0.335	0.049785	0
CARBOHYDRATE_CATABOLIC_PROCESS	24	http://www.broadinstitute.org/gsea/msigdb/cards/CARBOHYDRATE_CATABOLIC_PROCESS	-0.60531	-1.522	0.003884	0.061686	0.954	0.417	0.158	0.351	0.050237	0
MATTHEWS_SKIN_CARCINOGENESIS_VIA_JUN	16	http://www.broadinstitute.org/gsea/msigdb/cards/MATTHEWS_SKIN_CARCINOGENESIS_VIA_JUN	-0.626	-1.525	0.005894	0.06171	0.949	0.375	0.0775	0.346	0.050068	0
CHIARADONNA_NEOPLASTIC_TRANSFORMATION_CDC25_DN	152	http://www.broadinstitute.org/gsea/msigdb/cards/CHIARADONNA_NEOPLASTIC_TRANSFORMATION_CDC25_DN	-0.5255	-1.5207	0.002049	0.061734	0.955	0.322	0.132	0.281	0.050605	0
KEGG_PENTOSE_PHOSPHATE_PATHWAY	27	http://www.broadinstitute.org/gsea/msigdb/cards/KEGG_PENTOSE_PHOSPHATE_PATHWAY	-0.62643	-1.5268	0.004049	0.061839	0.943	0.519	0.164	0.434	0.050614	0
DENDRITE	16	http://www.broadinstitute.org/gsea/msigdb/cards/DENDRITE	-0.57988	-1.5212	0.004049	0.061864	0.955	0.25	0.0967	0.226	0.05051	0
ZHAN_MULTIPLE_MYELOMA_CD1_UP	45	http://www.broadinstitute.org/gsea/msigdb/cards/ZHAN_MULTIPLE_MYELOMA_CD1_UP	-0.52731	-1.5252	0.002037	0.06199	0.949	0.2	0.0435	0.192	0.050341	0
HUANG_GATA2_TARGETS_DN	70	http://www.broadinstitute.org/gsea/msigdb/cards/HUANG_GATA2_TARGETS_DN	-0.4896	-1.5157	0	0.064213	0.964	0.243	0.0955	0.22	0.052329	0
ALTEMEIER_RESPONSE_TO_LPS_WITH_MECHANICAL_VENTILATION	126	http://www.broadinstitute.org/gsea/msigdb/cards/ALTEMEIER_RESPONSE_TO_LPS_WITH_MECHANICAL_VENTILATION	-0.40187	-1.5161	0.01048	0.064321	0.964	0.198	0.134	0.173	0.052232	0
BIOCARTA_IL22BP_PATHWAY	16	http://www.broadinstitute.org/gsea/msigdb/cards/BIOCARTA_IL22BP_PATHWAY	-0.71075	-1.5161	0.005747	0.064711	0.964	0.25	0.0279	0.243	0.052549	0
V$ALX4_01	16	http://www.broadinstitute.org/gsea/msigdb/cards/V$ALX4_01	-0.53986	-1.5145	0.02386	0.064741	0.964	0.125	0.0183	0.123	0.0526	0
CYTOKINE_ACTIVITY	111	http://www.broadinstitute.org/gsea/msigdb/cards/CYTOKINE_ACTIVITY	-0.38439	-1.5131	0.003953	0.065579	0.967	0.144	0.113	0.128	0.052987	0
PID_NFAT_TFPATHWAY	47	http://www.broadinstitute.org/gsea/msigdb/cards/PID_NFAT_TFPATHWAY	-0.46045	-1.5123	0.009842	0.065734	0.968	0.191	0.106	0.171	0.053722	0
MUNSHI_MULTIPLE_MYELOMA_UP	79	http://www.broadinstitute.org/gsea/msigdb/cards/MUNSHI_MULTIPLE_MYELOMA_UP	-0.50894	-1.5108	0	0.06574	0.97	0.241	0.0852	0.221	0.055019	0
MTOR_UP.N4.V1_UP	192	http://www.broadinstitute.org/gsea/msigdb/cards/MTOR_UP.N4.V1_UP	-0.50689	-1.5118	0	0.065744	0.968	0.24	0.088	0.22	0.054087	0
REACTOME_REGULATION_OF_HYPOXIA_INDUCIBLE_FACTOR_HIF_BY_OXYGEN	24	http://www.broadinstitute.org/gsea/msigdb/cards/REACTOME_REGULATION_OF_HYPOXIA_INDUCIBLE_FACTOR_HIF_BY_OXYGEN	-0.58168	-1.5112	0.002032	0.065837	0.968	0.0833	0.000255	0.0834	0.054713	0
SANSOM_WNT_PATHWAY_REQUIRE_MYC	57	http://www.broadinstitute.org/gsea/msigdb/cards/SANSOM_WNT_PATHWAY_REQUIRE_MYC	-0.47201	-1.5094	0	0.06601	0.97	0.333	0.124	0.293	0.055086	0
KIM_WT1_TARGETS_12HR_UP	158	http://www.broadinstitute.org/gsea/msigdb/cards/KIM_WT1_TARGETS_12HR_UP	-0.49312	-1.5099	0	0.066041	0.97	0.209	0.0793	0.193	0.055172	0
HOLLEMAN_ASPARAGINASE_RESISTANCE_B_ALL_UP	26	http://www.broadinstitute.org/gsea/msigdb/cards/HOLLEMAN_ASPARAGINASE_RESISTANCE_B_ALL_UP	-0.49076	-1.5043	0.01643	0.06661	0.974	0.385	0.0973	0.347	0.054605	0
BURTON_ADIPOGENESIS_PEAK_AT_2HR	51	http://www.broadinstitute.org/gsea/msigdb/cards/BURTON_ADIPOGENESIS_PEAK_AT_2HR	-0.79962	-1.7624	0	0.066706	0.293	0.51	0.0962	0.462	0	0.001
MARTORIATI_MDM4_TARGETS_NEUROEPITHELIUM_UP	167	http://www.broadinstitute.org/gsea/msigdb/cards/MARTORIATI_MDM4_TARGETS_NEUROEPITHELIUM_UP	-0.59228	-1.5076	0.00198	0.066776	0.971	0.281	0.0551	0.267	0.05519	0
KORKOLA_TERATOMA_UP	16	http://www.broadinstitute.org/gsea/msigdb/cards/KORKOLA_TERATOMA_UP	-0.70845	-1.5036	0.01128	0.066817	0.974	0.5	0.167	0.417	0.054595	0
XU_HGF_SIGNALING_NOT_VIA_AKT1_6HR	26	http://www.broadinstitute.org/gsea/msigdb/cards/XU_HGF_SIGNALING_NOT_VIA_AKT1_6HR	-0.57402	-1.508	0.00611	0.066826	0.97	0.192	0.0335	0.186	0.054859	0
MYOSIN_COMPLEX	16	http://www.broadinstitute.org/gsea/msigdb/cards/MYOSIN_COMPLEX	-0.71602	-1.5054	0.001946	0.066911	0.973	0.375	0.0624	0.352	0.054757	0
CELLULAR_CARBOHYDRATE_CATABOLIC_PROCESS	23	http://www.broadinstitute.org/gsea/msigdb/cards/CELLULAR_CARBOHYDRATE_CATABOLIC_PROCESS	-0.61055	-1.5044	0.003884	0.066951	0.974	0.435	0.158	0.366	0.054829	0
BIOCARTA_IL3_PATHWAY	15	http://www.broadinstitute.org/gsea/msigdb/cards/BIOCARTA_IL3_PATHWAY	-0.60961	-1.5059	0.01	0.066971	0.973	0.133	0.0102	0.132	0.055061	0
PENG_LEUCINE_DEPRIVATION_UP	137	http://www.broadinstitute.org/gsea/msigdb/cards/PENG_LEUCINE_DEPRIVATION_UP	-0.49969	-1.5062	0.002004	0.067078	0.973	0.328	0.12	0.29	0.055018	0
BIOCARTA_HIF_PATHWAY	15	http://www.broadinstitute.org/gsea/msigdb/cards/BIOCARTA_HIF_PATHWAY	-0.67909	-1.5047	0.005894	0.067162	0.974	0.333	0.0824	0.306	0.055077	0
ONO_AML1_TARGETS_UP	24	http://www.broadinstitute.org/gsea/msigdb/cards/ONO_AML1_TARGETS_UP	-0.61293	-1.5062	0.009747	0.06745	0.973	0.25	0.0882	0.228	0.055328	0
IIZUKA_LIVER_CANCER_PROGRESSION_L1_G1_UP	25	http://www.broadinstitute.org/gsea/msigdb/cards/IIZUKA_LIVER_CANCER_PROGRESSION_L1_G1_UP	-0.61454	-1.5021	0.00789	0.067582	0.975	0.28	0.095	0.254	0.055107	0
PODAR_RESPONSE_TO_ADAPHOSTIN_UP	142	http://www.broadinstitute.org/gsea/msigdb/cards/PODAR_RESPONSE_TO_ADAPHOSTIN_UP	-0.53051	-1.5016	0.00611	0.06769	0.976	0.317	0.126	0.278	0.054861	0
ONO_FOXP3_TARGETS_DN	42	http://www.broadinstitute.org/gsea/msigdb/cards/ONO_FOXP3_TARGETS_DN	-0.44746	-1.501	0.009652	0.067871	0.976	0.19	0.0923	0.173	0.054601	0
PID_S1P_S1P1_PATHWAY	21	http://www.broadinstitute.org/gsea/msigdb/cards/PID_S1P_S1P1_PATHWAY	-0.54623	-1.4996	0.01443	0.067889	0.979	0.0952	0.0119	0.0942	0.054833	0
KEGG_MAPK_SIGNALING_PATHWAY	262	http://www.broadinstitute.org/gsea/msigdb/cards/KEGG_MAPK_SIGNALING_PATHWAY	-0.39474	-1.4989	0	0.068089	0.979	0.237	0.122	0.209	0.055841	0
LUI_THYROID_CANCER_PAX8_PPARG_DN	43	http://www.broadinstitute.org/gsea/msigdb/cards/LUI_THYROID_CANCER_PAX8_PPARG_DN	-0.51062	-1.5002	0.004098	0.068113	0.977	0.419	0.168	0.349	0.055022	0
MODULE_265	28	http://www.broadinstitute.org/gsea/msigdb/cards/MODULE_265	-0.4659	-1.4997	0.02419	0.068185	0.978	0.0357	0.000318	0.0357	0.055122	0
PODAR_RESPONSE_TO_ADAPHOSTIN_DN	17	http://www.broadinstitute.org/gsea/msigdb/cards/PODAR_RESPONSE_TO_ADAPHOSTIN_DN	-0.86013	-1.7499	0	0.068246	0.32	0.529	0.0488	0.504	0	0.001
AMINO_ACID_TRANSPORT	26	http://www.broadinstitute.org/gsea/msigdb/cards/AMINO_ACID_TRANSPORT	-0.49163	-1.4957	0.01212	0.070234	0.983	0.269	0.125	0.236	0.057845	0
HAHTOLA_MYCOSIS_FUNGOIDES_CD4_UP	64	http://www.broadinstitute.org/gsea/msigdb/cards/HAHTOLA_MYCOSIS_FUNGOIDES_CD4_UP	-0.48172	-1.4937	0.002	0.071631	0.985	0.234	0.0583	0.221	0.058433	0
MODULE_414	17	http://www.broadinstitute.org/gsea/msigdb/cards/MODULE_414	-0.56571	-1.4908	0.02924	0.071945	0.99	0.294	0.161	0.247	0.059269	0
KANG_FLUOROURACIL_RESISTANCE_UP	22	http://www.broadinstitute.org/gsea/msigdb/cards/KANG_FLUOROURACIL_RESISTANCE_UP	-0.57732	-1.491	0	0.072139	0.99	0.273	0.056	0.258	0.059406	0
TSUNODA_CISPLATIN_RESISTANCE_UP	15	http://www.broadinstitute.org/gsea/msigdb/cards/TSUNODA_CISPLATIN_RESISTANCE_UP	-0.7084	-1.4915	0.04651	0.072152	0.99	0.467	0.11	0.416	0.059325	0
ATF2_UP.V1_DN	179	http://www.broadinstitute.org/gsea/msigdb/cards/ATF2_UP.V1_DN	-0.48068	-1.4928	0.001972	0.072183	0.989	0.218	0.0997	0.197	0.059309	0
MURAKAMI_UV_RESPONSE_6HR_UP	37	http://www.broadinstitute.org/gsea/msigdb/cards/MURAKAMI_UV_RESPONSE_6HR_UP	-0.53727	-1.4922	0.01224	0.072284	0.99	0.351	0.153	0.298	0.059342	0
MODULE_153	34	http://www.broadinstitute.org/gsea/msigdb/cards/MODULE_153	-0.62894	-1.4918	0	0.07229	0.99	0.265	0.0591	0.249	0.059062	0
RESPONSE_TO_VIRUS	50	http://www.broadinstitute.org/gsea/msigdb/cards/RESPONSE_TO_VIRUS	-0.45884	-1.4867	0.002	0.072638	0.99	0.24	0.103	0.216	0.061244	0
PARK_TRETINOIN_RESPONSE_AND_RARA_PLZF_FUSION	22	http://www.broadinstitute.org/gsea/msigdb/cards/PARK_TRETINOIN_RESPONSE_AND_RARA_PLZF_FUSION	-0.6888	-1.7688	0	0.072835	0.275	0.273	0.0642	0.255	0	0.002
NAGASHIMA_NRG1_SIGNALING_DN	55	http://www.broadinstitute.org/gsea/msigdb/cards/NAGASHIMA_NRG1_SIGNALING_DN	-0.52205	-1.4868	0	0.072858	0.99	0.255	0.0885	0.232	0.061014	0
GAJATE_RESPONSE_TO_TRABECTEDIN_UP	65	http://www.broadinstitute.org/gsea/msigdb/cards/GAJATE_RESPONSE_TO_TRABECTEDIN_UP	-0.60521	-1.488	0.007858	0.072866	0.99	0.323	0.102	0.291	0.060935	0
BIOCARTA_ETS_PATHWAY	18	http://www.broadinstitute.org/gsea/msigdb/cards/BIOCARTA_ETS_PATHWAY	-0.60492	-1.4872	0.02146	0.072868	0.99	0.333	0.0513	0.316	0.061035	0
JISON_SICKLE_CELL_DISEASE_DN	165	http://www.broadinstitute.org/gsea/msigdb/cards/JISON_SICKLE_CELL_DISEASE_DN	-0.52445	-1.4872	0	0.073158	0.99	0.37	0.15	0.316	0.0613	0
BIOCARTA_CARDIACEGF_PATHWAY	18	http://www.broadinstitute.org/gsea/msigdb/cards/BIOCARTA_CARDIACEGF_PATHWAY	-0.53628	-1.4881	0.02353	0.073163	0.99	0.111	0.0183	0.109	0.061222	0
MARCHINI_TRABECTEDIN_RESISTANCE_DN	48	http://www.broadinstitute.org/gsea/msigdb/cards/MARCHINI_TRABECTEDIN_RESISTANCE_DN	-0.66635	-1.4887	0	0.073364	0.99	0.375	0.103	0.337	0.060564	0
chr2q21	64	http://www.broadinstitute.org/gsea/msigdb/cards/chr2q21	-0.47688	-1.4883	0.007843	0.07339	0.99	0.172	0.0836	0.158	0.061525	0
BOHN_PRIMARY_IMMUNODEFICIENCY_SYNDROM_UP	46	http://www.broadinstitute.org/gsea/msigdb/cards/BOHN_PRIMARY_IMMUNODEFICIENCY_SYNDROM_UP	-0.56467	-1.4849	0.002037	0.073822	0.991	0.457	0.136	0.395	0.062166	0
PID_INTEGRIN_A9B1_PATHWAY	25	http://www.broadinstitute.org/gsea/msigdb/cards/PID_INTEGRIN_A9B1_PATHWAY	-0.50652	-1.4835	0.004107	0.074643	0.991	0.36	0.149	0.306	0.063017	0
BIOCARTA_IL10_PATHWAY	17	http://www.broadinstitute.org/gsea/msigdb/cards/BIOCARTA_IL10_PATHWAY	-0.58394	-1.4803	0.01237	0.074784	0.994	0.235	0.0279	0.229	0.063283	0
GROSS_HYPOXIA_VIA_ELK3_DN	153	http://www.broadinstitute.org/gsea/msigdb/cards/GROSS_HYPOXIA_VIA_ELK3_DN	-0.53265	-1.4819	0.006122	0.075056	0.992	0.255	0.0798	0.236	0.063344	0
BIOCARTA_INSULIN_PATHWAY	22	http://www.broadinstitute.org/gsea/msigdb/cards/BIOCARTA_INSULIN_PATHWAY	-0.59786	-1.4804	0.01071	0.07511	0.993	0.364	0.127	0.318	0.063574	0
GARY_CD5_TARGETS_UP	458	http://www.broadinstitute.org/gsea/msigdb/cards/GARY_CD5_TARGETS_UP	-0.45043	-1.4807	0	0.075175	0.993	0.249	0.0974	0.228	0.063485	0
BOYLAN_MULTIPLE_MYELOMA_D_CLUSTER_UP	27	http://www.broadinstitute.org/gsea/msigdb/cards/BOYLAN_MULTIPLE_MYELOMA_D_CLUSTER_UP	-0.58052	-1.4821	0.004246	0.07525	0.992	0.407	0.136	0.352	0.063521	0
WANG_METHYLATED_IN_BREAST_CANCER	35	http://www.broadinstitute.org/gsea/msigdb/cards/WANG_METHYLATED_IN_BREAST_CANCER	-0.54659	-1.4823	0.0225	0.075378	0.992	0.257	0.0672	0.24	0.063488	0
HALMOS_CEBPA_TARGETS_UP	51	http://www.broadinstitute.org/gsea/msigdb/cards/HALMOS_CEBPA_TARGETS_UP	-0.44598	-1.4807	0.0104	0.07546	0.993	0.255	0.134	0.221	0.06378	0
ISOMERASE_ACTIVITY	35	http://www.broadinstitute.org/gsea/msigdb/cards/ISOMERASE_ACTIVITY	-0.53362	-1.481	0.001953	0.075505	0.993	0.343	0.132	0.298	0.063849	0
NGO_MALIGNANT_GLIOMA_1P_LOH	16	http://www.broadinstitute.org/gsea/msigdb/cards/NGO_MALIGNANT_GLIOMA_1P_LOH	-0.74425	-1.4771	0.01629	0.075788	0.996	0.562	0.0821	0.517	0.062677	0
chr9p12	23	http://www.broadinstitute.org/gsea/msigdb/cards/chr9p12	-0.51347	-1.4768	0.0166	0.075798	0.996	0.087	0.0117	0.086	0.062887	0
RESPONSE_TO_BIOTIC_STIMULUS	120	http://www.broadinstitute.org/gsea/msigdb/cards/RESPONSE_TO_BIOTIC_STIMULUS	-0.41811	-1.4783	0.004158	0.075806	0.995	0.15	0.0642	0.141	0.063306	0
KERLEY_RESPONSE_TO_CISPLATIN_UP	43	http://www.broadinstitute.org/gsea/msigdb/cards/KERLEY_RESPONSE_TO_CISPLATIN_UP	-0.56921	-1.4787	0.01844	0.075852	0.994	0.209	0.0628	0.196	0.063595	0
PIONTEK_PKD1_TARGETS_UP	37	http://www.broadinstitute.org/gsea/msigdb/cards/PIONTEK_PKD1_TARGETS_UP	-0.55504	-1.4773	0.003899	0.075884	0.995	0.297	0.075	0.275	0.062959	0
MODULE_318	26	http://www.broadinstitute.org/gsea/msigdb/cards/MODULE_318	-0.55166	-1.4756	0.01931	0.075952	0.997	0.192	0.0584	0.181	0.062959	0
VASCULATURE_DEVELOPMENT	55	http://www.broadinstitute.org/gsea/msigdb/cards/VASCULATURE_DEVELOPMENT	-0.41921	-1.4777	0.005917	0.075971	0.995	0.236	0.144	0.203	0.063116	0
JAIN_NFKB_SIGNALING	73	http://www.broadinstitute.org/gsea/msigdb/cards/JAIN_NFKB_SIGNALING	-0.50748	-1.4762	0	0.076019	0.996	0.205	0.0698	0.192	0.063175	0
YAO_TEMPORAL_RESPONSE_TO_PROGESTERONE_CLUSTER_8	48	http://www.broadinstitute.org/gsea/msigdb/cards/YAO_TEMPORAL_RESPONSE_TO_PROGESTERONE_CLUSTER_8	-0.49039	-1.4758	0.01014	0.076104	0.997	0.229	0.0678	0.214	0.063172	0
VALK_AML_CLUSTER_1	25	http://www.broadinstitute.org/gsea/msigdb/cards/VALK_AML_CLUSTER_1	-0.55818	-1.4737	0.02439	0.077159	0.997	0.4	0.12	0.352	0.064532	0
SHIN_B_CELL_LYMPHOMA_CLUSTER_2	30	http://www.broadinstitute.org/gsea/msigdb/cards/SHIN_B_CELL_LYMPHOMA_CLUSTER_2	-0.53578	-1.4733	0.01186	0.077191	0.997	0.4	0.172	0.332	0.064925	0
MARKEY_RB1_CHRONIC_LOF_UP	114	http://www.broadinstitute.org/gsea/msigdb/cards/MARKEY_RB1_CHRONIC_LOF_UP	-0.46799	-1.473	0	0.077228	0.998	0.254	0.0861	0.233	0.065113	0
DELLA_RESPONSE_TO_TSA_AND_BUTYRATE	21	http://www.broadinstitute.org/gsea/msigdb/cards/DELLA_RESPONSE_TO_TSA_AND_BUTYRATE	-0.64539	-1.4721	0.02783	0.077419	0.998	0.381	0.0815	0.35	0.065133	0
REACTOME_METABOLISM_OF_VITAMINS_AND_COFACTORS	50	http://www.broadinstitute.org/gsea/msigdb/cards/REACTOME_METABOLISM_OF_VITAMINS_AND_COFACTORS	-0.46143	-1.4724	0	0.077528	0.998	0.3	0.138	0.259	0.065215	0
BIOCARTA_CXCR4_PATHWAY	24	http://www.broadinstitute.org/gsea/msigdb/cards/BIOCARTA_CXCR4_PATHWAY	-0.5146	-1.4672	0.00813	0.079283	0.999	0.25	0.111	0.222	0.065618	0
WEST_ADRENOCORTICAL_TUMOR_MARKERS_UP	20	http://www.broadinstitute.org/gsea/msigdb/cards/WEST_ADRENOCORTICAL_TUMOR_MARKERS_UP	-0.61898	-1.4675	0.004032	0.079341	0.999	0.2	0.0112	0.198	0.065643	0
GAUSSMANN_MLL_AF4_FUSION_TARGETS_A_DN	86	http://www.broadinstitute.org/gsea/msigdb/cards/GAUSSMANN_MLL_AF4_FUSION_TARGETS_A_DN	-0.42426	-1.4675	0.006012	0.079674	0.999	0.337	0.194	0.273	0.065918	0
SIG_PIP3_SIGNALING_IN_B_LYMPHOCYTES	36	http://www.broadinstitute.org/gsea/msigdb/cards/SIG_PIP3_SIGNALING_IN_B_LYMPHOCYTES	-0.47669	-1.4693	0.006211	0.079679	0.999	0.333	0.107	0.298	0.065847	0
FIRESTEIN_CTNNB1_PATHWAY	32	http://www.broadinstitute.org/gsea/msigdb/cards/FIRESTEIN_CTNNB1_PATHWAY	-0.51591	-1.4689	0.003788	0.07969	0.999	0.312	0.113	0.277	0.065881	0
VALK_AML_CLUSTER_7	28	http://www.broadinstitute.org/gsea/msigdb/cards/VALK_AML_CLUSTER_7	-0.65362	-1.7747	0	0.079805	0.255	0.357	0.143	0.306	0	0.003
GNF2_IGFBP1	35	http://www.broadinstitute.org/gsea/msigdb/cards/GNF2_IGFBP1	-0.45135	-1.4661	0.03854	0.079925	0.999	0.229	0.135	0.198	0.06621	0
PLASARI_TGFB1_SIGNALING_VIA_NFIC_10HR_DN	29	http://www.broadinstitute.org/gsea/msigdb/cards/PLASARI_TGFB1_SIGNALING_VIA_NFIC_10HR_DN	-0.48112	-1.468	0	0.079927	0.999	0.172	0.0362	0.166	0.066177	0
BIOCARTA_P53HYPOXIA_PATHWAY	22	http://www.broadinstitute.org/gsea/msigdb/cards/BIOCARTA_P53HYPOXIA_PATHWAY	-0.55304	-1.4676	0.01042	0.079947	0.999	0.409	0.0899	0.373	0.066059	0
ZHONG_SECRETOME_OF_LUNG_CANCER_AND_ENDOTHELIUM	65	http://www.broadinstitute.org/gsea/msigdb/cards/ZHONG_SECRETOME_OF_LUNG_CANCER_AND_ENDOTHELIUM	-0.49287	-1.4681	0.002032	0.080189	0.999	0.369	0.153	0.314	0.066458	0
STREICHER_LSM1_TARGETS_UP	43	http://www.broadinstitute.org/gsea/msigdb/cards/STREICHER_LSM1_TARGETS_UP	-0.48055	-1.4655	0.002146	0.080287	0.999	0.14	0.0455	0.133	0.066869	0
CHENG_RESPONSE_TO_NICKEL_ACETATE	41	http://www.broadinstitute.org/gsea/msigdb/cards/CHENG_RESPONSE_TO_NICKEL_ACETATE	-0.5335	-1.4643	0.005906	0.081149	0.999	0.293	0.117	0.259	0.067446	0
OXIDOREDUCTASE_ACTIVITY_GO_0016705	35	http://www.broadinstitute.org/gsea/msigdb/cards/OXIDOREDUCTASE_ACTIVITY_GO_0016705	-0.56155	-1.7886	0.006186	0.08115	0.21	0.257	0.0756	0.238	0	0.009
AKT_UP.V1_UP	166	http://www.broadinstitute.org/gsea/msigdb/cards/AKT_UP.V1_UP	-0.44988	-1.4635	0.006	0.08123	0.999	0.265	0.137	0.23	0.067341	0
BIOCARTA_IL2_PATHWAY	22	http://www.broadinstitute.org/gsea/msigdb/cards/BIOCARTA_IL2_PATHWAY	-0.59714	-1.4637	0.02227	0.081388	0.999	0.409	0.111	0.364	0.067505	0
BRACHAT_RESPONSE_TO_METHOTREXATE_DN	26	http://www.broadinstitute.org/gsea/msigdb/cards/BRACHAT_RESPONSE_TO_METHOTREXATE_DN	-0.59157	-1.4631	0	0.081453	0.999	0.346	0.0314	0.336	0.067844	0
ONO_AML1_TARGETS_DN	41	http://www.broadinstitute.org/gsea/msigdb/cards/ONO_AML1_TARGETS_DN	-0.40322	-1.4616	0.004228	0.081798	0.999	0.171	0.0923	0.155	0.06783	0
CHARAFE_BREAST_CANCER_BASAL_VS_MESENCHYMAL_DN	48	http://www.broadinstitute.org/gsea/msigdb/cards/CHARAFE_BREAST_CANCER_BASAL_VS_MESENCHYMAL_DN	-0.52557	-1.4619	0	0.08182	0.999	0.375	0.175	0.31	0.067617	0
DORN_ADENOVIRUS_INFECTION_24HR_DN	41	http://www.broadinstitute.org/gsea/msigdb/cards/DORN_ADENOVIRUS_INFECTION_24HR_DN	-0.46124	-1.462	0	0.082108	0.999	0.366	0.121	0.322	0.067679	0
CARBOXYLIC_ACID_TRANSMEMBRANE_TRANSPORTER_ACTIVITY	44	http://www.broadinstitute.org/gsea/msigdb/cards/CARBOXYLIC_ACID_TRANSMEMBRANE_TRANSPORTER_ACTIVITY	-0.40427	-1.4605	0.006	0.082534	0.999	0.25	0.125	0.219	0.068412	0
RESPONSE_TO_WOUNDING	187	http://www.broadinstitute.org/gsea/msigdb/cards/RESPONSE_TO_WOUNDING	-0.36631	-1.4525	0.003922	0.084866	0.999	0.128	0.108	0.115	0.07079	0
KAN_RESPONSE_TO_ARSENIC_TRIOXIDE	122	http://www.broadinstitute.org/gsea/msigdb/cards/KAN_RESPONSE_TO_ARSENIC_TRIOXIDE	-0.58498	-1.452	0.00396	0.085035	0.999	0.295	0.0752	0.274	0.070862	0
HESS_TARGETS_OF_HOXA9_AND_MEIS1_DN	76	http://www.broadinstitute.org/gsea/msigdb/cards/HESS_TARGETS_OF_HOXA9_AND_MEIS1_DN	-0.51278	-1.4525	0.01172	0.085129	0.999	0.303	0.136	0.262	0.071056	0
HOFFMANN_PRE_BI_TO_LARGE_PRE_BII_LYMPHOCYTE_DN	72	http://www.broadinstitute.org/gsea/msigdb/cards/HOFFMANN_PRE_BI_TO_LARGE_PRE_BII_LYMPHOCYTE_DN	-0.52423	-1.4505	0	0.085235	0.999	0.306	0.111	0.272	0.070643	0
BIOCARTA_IGF1_PATHWAY	21	http://www.broadinstitute.org/gsea/msigdb/cards/BIOCARTA_IGF1_PATHWAY	-0.60782	-1.4509	0.02146	0.085248	0.999	0.333	0.111	0.296	0.070641	0
NIELSEN_GIST_VS_SYNOVIAL_SARCOMA_UP	19	http://www.broadinstitute.org/gsea/msigdb/cards/NIELSEN_GIST_VS_SYNOVIAL_SARCOMA_UP	-0.61364	-1.4537	0.003891	0.085341	0.999	0.421	0.12	0.371	0.071116	0
BRACHAT_RESPONSE_TO_CAMPTOTHECIN_DN	43	http://www.broadinstitute.org/gsea/msigdb/cards/BRACHAT_RESPONSE_TO_CAMPTOTHECIN_DN	-0.53344	-1.4511	0	0.085358	0.999	0.326	0.0672	0.304	0.070646	0
MYOBLAST_DIFFERENTIATION	17	http://www.broadinstitute.org/gsea/msigdb/cards/MYOBLAST_DIFFERENTIATION	-0.56077	-1.4526	0	0.085384	0.999	0.471	0.126	0.412	0.071249	0
chr5q34	25	http://www.broadinstitute.org/gsea/msigdb/cards/chr5q34	-0.46425	-1.4546	0.04134	0.0854	0.999	0.28	0.121	0.246	0.071494	0
MODULE_175	53	http://www.broadinstitute.org/gsea/msigdb/cards/MODULE_175	-0.46101	-1.4559	0.01263	0.08543	0.999	0.358	0.174	0.297	0.071981	0
DUNNE_TARGETS_OF_AML1_MTG8_FUSION_UP	49	http://www.broadinstitute.org/gsea/msigdb/cards/DUNNE_TARGETS_OF_AML1_MTG8_FUSION_UP	-0.5166	-1.4532	0.006098	0.085457	0.999	0.245	0.119	0.216	0.071714	0
MORF_JUND	64	http://www.broadinstitute.org/gsea/msigdb/cards/MORF_JUND	-0.55152	-1.4529	0.01397	0.085461	0.999	0.391	0.121	0.344	0.071443	0
WARTERS_IR_RESPONSE_5GY	45	http://www.broadinstitute.org/gsea/msigdb/cards/WARTERS_IR_RESPONSE_5GY	-0.53236	-1.4541	0.002049	0.085509	0.999	0.178	0.0372	0.171	0.071355	0
BERTUCCI_INVASIVE_CARCINOMA_DUCTAL_VS_LOBULAR_UP	23	http://www.broadinstitute.org/gsea/msigdb/cards/BERTUCCI_INVASIVE_CARCINOMA_DUCTAL_VS_LOBULAR_UP	-0.59327	-1.4538	0.02041	0.085528	0.999	0.304	0.048	0.29	0.071272	0
MARIADASON_RESPONSE_TO_CURCUMIN_SULINDAC_7	17	http://www.broadinstitute.org/gsea/msigdb/cards/MARIADASON_RESPONSE_TO_CURCUMIN_SULINDAC_7	-0.5753	-1.4512	0.01796	0.085587	0.999	0.412	0.121	0.362	0.070908	0
PID_S1P_S1P3_PATHWAY	29	http://www.broadinstitute.org/gsea/msigdb/cards/PID_S1P_S1P3_PATHWAY	-0.50365	-1.455	0.00211	0.085619	0.999	0.069	0.000318	0.069	0.071975	0
V$CHOP_01	234	http://www.broadinstitute.org/gsea/msigdb/cards/V$CHOP_01	-0.42604	-1.4553	0	0.085694	0.999	0.274	0.117	0.243	0.07223	0
POMEROY_MEDULLOBLASTOMA_PROGNOSIS_DN	43	http://www.broadinstitute.org/gsea/msigdb/cards/POMEROY_MEDULLOBLASTOMA_PROGNOSIS_DN	-0.57249	-1.4546	0	0.085709	0.999	0.302	0.112	0.269	0.071771	0
MODULE_286	37	http://www.broadinstitute.org/gsea/msigdb/cards/MODULE_286	-0.42275	-1.4559	0.01844	0.085752	0.999	0.216	0.0913	0.197	0.072264	0
CHO_NR4A1_TARGETS	32	http://www.broadinstitute.org/gsea/msigdb/cards/CHO_NR4A1_TARGETS	-0.71852	-1.8435	0	0.085891	0.125	0.281	0.0426	0.27	0	0.019
LEE_CALORIE_RESTRICTION_MUSCLE_UP	41	http://www.broadinstitute.org/gsea/msigdb/cards/LEE_CALORIE_RESTRICTION_MUSCLE_UP	-0.64303	-1.4495	0.01186	0.086001	0.999	0.341	0.103	0.307	0.071841	0
ST_GRANULE_CELL_SURVIVAL_PATHWAY	26	http://www.broadinstitute.org/gsea/msigdb/cards/ST_GRANULE_CELL_SURVIVAL_PATHWAY	-0.60332	-1.456	0.001969	0.086012	0.999	0.423	0.134	0.367	0.07255	0
BRUNO_HEMATOPOIESIS	64	http://www.broadinstitute.org/gsea/msigdb/cards/BRUNO_HEMATOPOIESIS	-0.4985	-1.4561	0.004024	0.086207	0.999	0.344	0.136	0.298	0.072837	0
WENG_POR_TARGETS_GLOBAL_UP	19	http://www.broadinstitute.org/gsea/msigdb/cards/WENG_POR_TARGETS_GLOBAL_UP	-0.76494	-1.4489	0.008282	0.086321	0.999	0.368	0.034	0.356	0.072189	0
BIOCARTA_ARAP_PATHWAY	17	http://www.broadinstitute.org/gsea/msigdb/cards/BIOCARTA_ARAP_PATHWAY	-0.57473	-1.4561	0.05078	0.086471	0.999	0.353	0.084	0.323	0.072609	0
LEE_AGING_NEOCORTEX_UP	88	http://www.broadinstitute.org/gsea/msigdb/cards/LEE_AGING_NEOCORTEX_UP	-0.51738	-1.4483	0.002037	0.086555	0.999	0.261	0.0917	0.238	0.072611	0
SHETH_LIVER_CANCER_VS_TXNIP_LOSS_PAM3	70	http://www.broadinstitute.org/gsea/msigdb/cards/SHETH_LIVER_CANCER_VS_TXNIP_LOSS_PAM3	-0.54001	-1.4468	0.003891	0.086732	0.999	0.286	0.0774	0.264	0.07234	0
MARZEC_IL2_SIGNALING_UP	112	http://www.broadinstitute.org/gsea/msigdb/cards/MARZEC_IL2_SIGNALING_UP	-0.42967	-1.447	0.002	0.086872	0.999	0.196	0.0741	0.183	0.072475	0
SEITZ_NEOPLASTIC_TRANSFORMATION_BY_8P_DELETION_DN	30	http://www.broadinstitute.org/gsea/msigdb/cards/SEITZ_NEOPLASTIC_TRANSFORMATION_BY_8P_DELETION_DN	-0.7309	-1.4472	0.00396	0.087045	0.999	0.267	0.0372	0.257	0.072737	0
DASU_IL6_SIGNALING_SCAR_DN	16	http://www.broadinstitute.org/gsea/msigdb/cards/DASU_IL6_SIGNALING_SCAR_DN	-0.58826	-1.4473	0.02828	0.087209	0.999	0.312	0.112	0.278	0.072795	0
GNF2_PTPN4	48	http://www.broadinstitute.org/gsea/msigdb/cards/GNF2_PTPN4	-0.41013	-1.4441	0.006073	0.087859	0.999	0.229	0.109	0.204	0.074028	0
GNF2_MATK	23	http://www.broadinstitute.org/gsea/msigdb/cards/GNF2_MATK	-0.39473	-1.4436	0.04208	0.087981	0.999	0.217	0.0966	0.197	0.073885	0
XU_RESPONSE_TO_TRETINOIN_UP	16	http://www.broadinstitute.org/gsea/msigdb/cards/XU_RESPONSE_TO_TRETINOIN_UP	-0.60307	-1.4442	0.01018	0.088165	0.999	0.25	0.0787	0.23	0.074289	0
LAMB_CCND1_TARGETS	19	http://www.broadinstitute.org/gsea/msigdb/cards/LAMB_CCND1_TARGETS	-0.59052	-1.4425	0.04107	0.088265	0.999	0.263	0.0359	0.254	0.07451	0
BIOCARTA_TID_PATHWAY	19	http://www.broadinstitute.org/gsea/msigdb/cards/BIOCARTA_TID_PATHWAY	-0.54744	-1.4443	0.01927	0.088382	0.999	0.316	0.124	0.277	0.074553	0
MEL18_DN.V1_UP	139	http://www.broadinstitute.org/gsea/msigdb/cards/MEL18_DN.V1_UP	-0.48187	-1.443	0.001957	0.08839	0.999	0.245	0.136	0.212	0.074781	0
RUAN_RESPONSE_TO_TNF_DN	83	http://www.broadinstitute.org/gsea/msigdb/cards/RUAN_RESPONSE_TO_TNF_DN	-0.43111	-1.4419	0.002058	0.088474	0.999	0.241	0.105	0.216	0.074496	0
YAO_TEMPORAL_RESPONSE_TO_PROGESTERONE_CLUSTER_1	67	http://www.broadinstitute.org/gsea/msigdb/cards/YAO_TEMPORAL_RESPONSE_TO_PROGESTERONE_CLUSTER_1	-0.49606	-1.4425	0.00994	0.088499	0.999	0.299	0.136	0.258	0.07477	0
CHNG_MULTIPLE_MYELOMA_HYPERPLOID_UP	52	http://www.broadinstitute.org/gsea/msigdb/cards/CHNG_MULTIPLE_MYELOMA_HYPERPLOID_UP	-0.53696	-1.4447	0.03831	0.088518	0.999	0.423	0.166	0.353	0.074705	0
GNF2_ST13	63	http://www.broadinstitute.org/gsea/msigdb/cards/GNF2_ST13	-0.62471	-1.4443	0	0.088628	0.999	0.429	0.0973	0.388	0.074691	0
HUI_MAPK14_TARGETS_UP	20	http://www.broadinstitute.org/gsea/msigdb/cards/HUI_MAPK14_TARGETS_UP	-0.49723	-1.4409	0.02521	0.089065	1	0.35	0.135	0.303	0.075409	0
TENEDINI_MEGAKARYOCYTE_MARKERS	64	http://www.broadinstitute.org/gsea/msigdb/cards/TENEDINI_MEGAKARYOCYTE_MARKERS	-0.46363	-1.4399	0	0.089764	1	0.203	0.103	0.183	0.076059	0
VISALA_AGING_LYMPHOCYTE_DN	17	http://www.broadinstitute.org/gsea/msigdb/cards/VISALA_AGING_LYMPHOCYTE_DN	-0.53632	-1.4395	0.006098	0.090081	1	0.176	0.014	0.174	0.076155	0
KEGG_GALACTOSE_METABOLISM	26	http://www.broadinstitute.org/gsea/msigdb/cards/KEGG_GALACTOSE_METABOLISM	-0.55471	-1.4391	0.02419	0.090089	1	0.231	0.0692	0.215	0.076115	0
LANDIS_BREAST_CANCER_PROGRESSION_UP	44	http://www.broadinstitute.org/gsea/msigdb/cards/LANDIS_BREAST_CANCER_PROGRESSION_UP	-0.57507	-1.4379	0	0.090855	1	0.5	0.133	0.434	0.076904	0
CREIGHTON_AKT1_SIGNALING_VIA_MTOR_UP	33	http://www.broadinstitute.org/gsea/msigdb/cards/CREIGHTON_AKT1_SIGNALING_VIA_MTOR_UP	-0.58125	-1.4375	0.01383	0.090975	1	0.303	0.0635	0.284	0.076856	0
KERATINOCYTE_DIFFERENTIATION	15	http://www.broadinstitute.org/gsea/msigdb/cards/KERATINOCYTE_DIFFERENTIATION	-0.7285	-1.4379	0.0113	0.091109	1	0.333	0.0297	0.324	0.077166	0
MODULE_120	71	http://www.broadinstitute.org/gsea/msigdb/cards/MODULE_120	-0.43697	-1.4367	0.02658	0.091406	1	0.282	0.137	0.244	0.077292	0
DORN_ADENOVIRUS_INFECTION_12HR_UP	28	http://www.broadinstitute.org/gsea/msigdb/cards/DORN_ADENOVIRUS_INFECTION_12HR_UP	-0.52449	-1.4358	0.004	0.091988	1	0.429	0.194	0.346	0.077912	0
MANTOVANI_NFKB_TARGETS_UP	43	http://www.broadinstitute.org/gsea/msigdb/cards/MANTOVANI_NFKB_TARGETS_UP	-0.47183	-1.4354	0	0.092032	1	0.349	0.181	0.286	0.077903	0
VANDESLUIS_COMMD1_TARGETS_GROUP_3_UP	86	http://www.broadinstitute.org/gsea/msigdb/cards/VANDESLUIS_COMMD1_TARGETS_GROUP_3_UP	-0.54261	-1.4329	0.009747	0.092182	1	0.314	0.0892	0.287	0.078585	0
MCCLUNG_DELTA_FOSB_TARGETS_2WK	46	http://www.broadinstitute.org/gsea/msigdb/cards/MCCLUNG_DELTA_FOSB_TARGETS_2WK	-0.59166	-1.433	0	0.09226	1	0.261	0.0613	0.245	0.078477	0
RB_DN.V1_DN	123	http://www.broadinstitute.org/gsea/msigdb/cards/RB_DN.V1_DN	-0.50721	-1.4331	0	0.092483	1	0.309	0.127	0.271	0.078451	0
CRX_DN.V1_UP	135	http://www.broadinstitute.org/gsea/msigdb/cards/CRX_DN.V1_UP	-0.39495	-1.4323	0.0119	0.092503	1	0.133	0.061	0.126	0.078537	0
MODULE_218	20	http://www.broadinstitute.org/gsea/msigdb/cards/MODULE_218	-0.53898	-1.4317	0.08818	0.092587	1	0.45	0.236	0.344	0.078517	0
VART_KSHV_INFECTION_ANGIOGENIC_MARKERS_UP	164	http://www.broadinstitute.org/gsea/msigdb/cards/VART_KSHV_INFECTION_ANGIOGENIC_MARKERS_UP	-0.41483	-1.4345	0.001938	0.092672	1	0.201	0.12	0.178	0.078199	0
HALMOS_CEBPA_TARGETS_DN	46	http://www.broadinstitute.org/gsea/msigdb/cards/HALMOS_CEBPA_TARGETS_DN	-0.54111	-1.4319	0.01429	0.092699	1	0.304	0.0615	0.286	0.078643	0
SCHURINGA_STAT5A_TARGETS_DN	15	http://www.broadinstitute.org/gsea/msigdb/cards/SCHURINGA_STAT5A_TARGETS_DN	-0.69156	-1.4332	0.0355	0.0927	1	0.133	0.0736	0.124	0.078709	0
AMINE_BIOSYNTHETIC_PROCESS	15	http://www.broadinstitute.org/gsea/msigdb/cards/AMINE_BIOSYNTHETIC_PROCESS	-0.58127	-1.8008	0	0.092884	0.187	0.333	0.0707	0.31	0	0.015
MIKKELSEN_IPS_ICP_WITH_H3K4ME3_AND_H327ME3	124	http://www.broadinstitute.org/gsea/msigdb/cards/MIKKELSEN_IPS_ICP_WITH_H3K4ME3_AND_H327ME3	-0.48552	-1.4333	0	0.092962	1	0.234	0.132	0.204	0.078828	0
KIM_WT1_TARGETS_8HR_UP	161	http://www.broadinstitute.org/gsea/msigdb/cards/KIM_WT1_TARGETS_8HR_UP	-0.42729	-1.4335	0.002045	0.093089	1	0.174	0.0778	0.161	0.079041	0
STRIATED_MUSCLE_DEVELOPMENT	40	http://www.broadinstitute.org/gsea/msigdb/cards/STRIATED_MUSCLE_DEVELOPMENT	-0.45789	-1.4336	0	0.093283	1	0.35	0.126	0.306	0.078816	0
MARTORIATI_MDM4_TARGETS_FETAL_LIVER_UP	215	http://www.broadinstitute.org/gsea/msigdb/cards/MARTORIATI_MDM4_TARGETS_FETAL_LIVER_UP	-0.48149	-1.4304	0.00202	0.093717	1	0.274	0.113	0.245	0.079639	0
MULTI_ORGANISM_PROCESS	164	http://www.broadinstitute.org/gsea/msigdb/cards/MULTI_ORGANISM_PROCESS	-0.38132	-1.4292	0	0.094801	1	0.195	0.128	0.171	0.079952	0
ZHENG_IL22_SIGNALING_UP	55	http://www.broadinstitute.org/gsea/msigdb/cards/ZHENG_IL22_SIGNALING_UP	-0.53446	-1.4288	0	0.094964	1	0.255	0.119	0.225	0.08018	0
chr1p32	76	http://www.broadinstitute.org/gsea/msigdb/cards/chr1p32	-0.50482	-1.4281	0.01042	0.095184	1	0.316	0.106	0.283	0.080223	0
GRADE_COLON_CANCER_DN	31	http://www.broadinstitute.org/gsea/msigdb/cards/GRADE_COLON_CANCER_DN	-0.51811	-1.4274	0.03593	0.095416	1	0.194	0.0676	0.181	0.081001	0
BIOCARTA_ERK_PATHWAY	28	http://www.broadinstitute.org/gsea/msigdb/cards/BIOCARTA_ERK_PATHWAY	-0.50698	-1.4281	0.0225	0.095444	1	0.357	0.168	0.297	0.080478	0
CELL_SURFACE	78	http://www.broadinstitute.org/gsea/msigdb/cards/CELL_SURFACE	-0.39646	-1.4274	0	0.095708	1	0.218	0.129	0.19	0.081258	0
REACTOME_ACYL_CHAIN_REMODELLING_OF_PG	16	http://www.broadinstitute.org/gsea/msigdb/cards/REACTOME_ACYL_CHAIN_REMODELLING_OF_PG	-0.51322	-1.4253	0.06017	0.097424	1	0.188	0.0751	0.173	0.083879	0
ORGANIC_ACID_TRANSMEMBRANE_TRANSPORTER_ACTIVITY	45	http://www.broadinstitute.org/gsea/msigdb/cards/ORGANIC_ACID_TRANSMEMBRANE_TRANSPORTER_ACTIVITY	-0.39063	-1.4244	0.01394	0.098029	1	0.244	0.125	0.214	0.084264	0
BROCKE_APOPTOSIS_REVERSED_BY_IL6	140	http://www.broadinstitute.org/gsea/msigdb/cards/BROCKE_APOPTOSIS_REVERSED_BY_IL6	-0.44417	-1.4234	0	0.098971	1	0.264	0.104	0.238	0.085083	0
MULLIGHAN_NPM1_MUTATED_SIGNATURE_2_DN	75	http://www.broadinstitute.org/gsea/msigdb/cards/MULLIGHAN_NPM1_MUTATED_SIGNATURE_2_DN	-0.44639	-1.4211	0.007921	0.099036	1	0.213	0.0738	0.198	0.085016	0
GAUSSMANN_MLL_AF4_FUSION_TARGETS_E_DN	22	http://www.broadinstitute.org/gsea/msigdb/cards/GAUSSMANN_MLL_AF4_FUSION_TARGETS_E_DN	-0.49856	-1.4208	0.04115	0.099099	1	0.136	0.0195	0.134	0.084883	0
MANTOVANI_VIRAL_GPCR_SIGNALING_DN	49	http://www.broadinstitute.org/gsea/msigdb/cards/MANTOVANI_VIRAL_GPCR_SIGNALING_DN	-0.52309	-1.4216	0.007984	0.099101	1	0.306	0.113	0.272	0.085382	0
HU_ANGIOGENESIS_UP	20	http://www.broadinstitute.org/gsea/msigdb/cards/HU_ANGIOGENESIS_UP	-0.58389	-1.423	0.06067	0.099135	1	0.35	0.103	0.314	0.085007	0
REACTOME_FRS2_MEDIATED_CASCADE	35	http://www.broadinstitute.org/gsea/msigdb/cards/REACTOME_FRS2_MEDIATED_CASCADE	-0.42796	-1.4213	0.02049	0.099178	1	0.2	0.111	0.178	0.085236	0
MANALO_HYPOXIA_UP	200	http://www.broadinstitute.org/gsea/msigdb/cards/MANALO_HYPOXIA_UP	-0.53789	-1.4216	0	0.09933	1	0.27	0.0793	0.25	0.085574	0
BIOCARTA_MET_PATHWAY	37	http://www.broadinstitute.org/gsea/msigdb/cards/BIOCARTA_MET_PATHWAY	-0.46131	-1.4201	0.004175	0.099423	1	0.27	0.118	0.239	0.085264	0
MORF_ACTG1	138	http://www.broadinstitute.org/gsea/msigdb/cards/MORF_ACTG1	-0.49716	-1.4217	0.009728	0.099561	1	0.341	0.113	0.303	0.085838	0
CARBOHYDRATE_KINASE_ACTIVITY	15	http://www.broadinstitute.org/gsea/msigdb/cards/CARBOHYDRATE_KINASE_ACTIVITY	-0.69971	-1.4224	0.01758	0.099603	1	0.467	0.133	0.405	0.085975	0
MORF_NPM1	161	http://www.broadinstitute.org/gsea/msigdb/cards/MORF_NPM1	-0.4724	-1.4218	0.0161	0.099793	1	0.335	0.117	0.298	0.086103	0
AMUNDSON_DNA_DAMAGE_RESPONSE_TP53	16	http://www.broadinstitute.org/gsea/msigdb/cards/AMUNDSON_DNA_DAMAGE_RESPONSE_TP53	-0.60432	-1.4218	0.04508	0.1	1	0.562	0.231	0.433	0.086369	0

## Sheet: S4 cMap output
Supplemental Table 4 - Connectivity Map output ranked list
rank	cmap name	mean	n	enrichment	p	specificity	percent non-null
1	monorden	0.212	22	0.572	0	0.0107	50
2	sirolimus	0.278	44	0.428	0	0.1145	61
3	LY-294002	0.267	61	0.423	0	0.094	60
4	quinisocaine	-0.601	4	-0.87	0.00058	0	100
5	dosulepin	-0.649	4	-0.85	0.00095	0	100
6	thapsigargin	-0.751	3	-0.913	0.00116	0.0774	100
7	apramycin	0.511	4	0.818	0.00195	0	100
8	clemizole	-0.539	5	-0.724	0.00344	0	80
9	pipemidic acid	0.49	3	0.871	0.00391	0.0159	100
10	diphemanil metilsulfate	-0.247	5	-0.712	0.00425	0.014	60
11	ionomycin	-0.577	3	-0.868	0.00453	0.0246	100
12	fluticasone	-0.607	4	-0.783	0.00454	0.0191	100
13	AR-A014418	0.438	3	0.849	0.00645	0.028	100
14	trihexyphenidyl	-0.621	3	-0.851	0.00651	0.015	100
15	16-phenyltetranorprostaglandin E2	0.31	4	0.75	0.0076	0	75
16	methoxamine	-0.436	4	-0.749	0.0079	0.0258	100
17	flumetasone	-0.31	6	-0.627	0.00842	0.0198	50
18	wortmannin	0.177	18	0.375	0.00859	0.3355	50
19	simvastatin	-0.469	4	-0.74	0.00891	0.0133	75
20	thiamazole	-0.425	6	-0.62	0.00963	0.0368	66
21	antimycin A	-0.503	5	-0.662	0.01057	0.0522	80
22	rilmenidine	-0.358	4	-0.73	0.01062	0.0069	75
23	amikacin	0.327	4	0.722	0.01188	0.0089	75
24	hexestrol	-0.476	4	-0.723	0.01196	0.0365	75
25	spaglumic acid	0.541	2	0.922	0.01217	0.0238	100
26	flumequine	0.45	4	0.72	0.01243	0.0213	75
27	diclofenac	-0.256	5	-0.652	0.01252	0.0163	60
28	0198306-0000	0.363	4	0.716	0.01327	0.0074	75
29	fenbendazole	-0.524	4	-0.715	0.01337	0.0165	75
30	mebendazole	-0.456	5	-0.645	0.01382	0.1165	80
31	etoposide	0.25	4	0.71	0.01444	0.1333	50
32	CP-320650-01	-0.308	8	-0.524	0.01452	0.1295	62
33	emetine	-0.483	4	-0.71	0.01456	0.2118	75
34	glycopyrronium bromide	-0.354	5	-0.636	0.01642	0.0256	60
35	josamycin	-0.442	5	-0.632	0.01738	0.04	80
36	NS-398	0.33	3	0.792	0.01821	0.0443	100
37	corynanthine	-0.547	3	-0.791	0.01855	0.0163	100
38	nocodazole	-0.466	6	-0.582	0.01855	0.0645	66
39	PHA-00816795	0.483	2	0.903	0.01915	0	100
40	phenoxybenzamine	-0.518	4	-0.691	0.01959	0.1818	75
41	naftifine	-0.341	4	-0.68	0.02286	0.0392	75
42	meclofenamic acid	0.276	5	0.621	0.02291	0.0347	60
43	chlorogenic acid	-0.517	4	-0.678	0.02385	0.0229	75
44	zoxazolamine	-0.29	4	-0.675	0.02473	0.0657	50
45	cefadroxil	0.255	4	0.67	0.02632	0.0089	75
46	etiocholanolone	-0.265	6	-0.56	0.02719	0.2727	66
47	hydralazine	-0.399	6	-0.559	0.02743	0.0423	66
48	mitoxantrone	0.255	3	0.756	0.0287	0.0819	66
49	ciclosporin	-0.305	6	-0.554	0.02999	0.0467	66
50	cloperastine	-0.44	6	-0.553	0.03021	0.1177	66
51	drofenine	-0.344	4	-0.66	0.03036	0.0315	50
52	corticosterone	-0.374	4	-0.656	0.03235	0.017	75
53	ciprofibrate	0.205	4	0.656	0.03262	0.0197	50
54	spironolactone	0.311	5	0.596	0.0333	0.1006	80
55	Prestwick-1085	-0.27	4	-0.654	0.03348	0.0355	50
56	heptaminol	-0.403	5	-0.588	0.03456	0.226	80
57	oxybutynin	-0.414	4	-0.651	0.03513	0.0311	75
58	phthalylsulfathiazole	0.281	5	0.586	0.03751	0.2478	80
59	trichlormethiazide	-0.259	4	-0.646	0.03756	0.0357	50
60	doxycycline	0.161	5	0.585	0.03819	0.0222	80
61	levothyroxine sodium	-0.363	4	-0.638	0.04116	0.0849	75
62	valinomycin	-0.473	4	-0.638	0.04144	0.1429	75
63	fludroxycortide	-0.343	5	-0.575	0.04157	0.0914	60
64	astemizole	-0.439	5	-0.575	0.04171	0.2178	60
65	spiperone	-0.543	2	-0.856	0.04177	0.079	100
66	Prestwick-642	-0.447	4	-0.631	0.04502	0.1862	75
67	sulfadimethoxine	-0.39	5	-0.568	0.04514	0.3111	80
68	androsterone	-0.245	4	-0.631	0.04518	0	50
69	clofibrate	-0.505	2	-0.85	0.04525	0.0272	100
70	pregnenolone	-0.345	4	-0.631	0.04538	0.0701	75
71	beta-escin	-0.4	6	-0.527	0.04551	0.0992	66
72	todralazine	0.262	5	0.571	0.04588	0.0242	60
73	pivampicillin	-0.371	4	-0.63	0.04589	0.0428	75
74	phensuximide	0.379	4	0.629	0.04737	0.0294	75
75	tremorine	0.299	4	0.625	0.04957	0	75
76	proxymetacaine	-0.39	4	-0.624	0.04971	0.016	75
77	iopanoic acid	0.324	4	0.624	0.04983	0	75
78	propylthiouracil	-0.222	4	-0.623	0.05041	0.1406	50
79	benzylpenicillin	0.386	4	0.622	0.05156	0.0382	75
80	lomustine	-0.426	4	-0.62	0.052	0.3028	75
81	fosfosal	-0.24	4	-0.616	0.05483	0.0526	50
82	rolipram	-0.226	4	-0.615	0.05528	0.0526	50
83	0175029-0000	0.21	6	0.511	0.05578	0.4706	50
84	etofenamate	-0.229	4	-0.614	0.0564	0.0657	75
85	procainamide	-0.232	4	-0.612	0.05753	0.0415	50
86	cefmetazole	0.193	4	0.613	0.05773	0.0234	75
87	chlortetracycline	-0.307	5	-0.55	0.0581	0.032	60
88	lobeline	0.253	4	0.612	0.05849	0.0221	50
89	hecogenin	0.321	4	0.61	0.05958	0.0229	75
90	cephaeline	-0.454	5	-0.546	0.06158	0.5723	60
91	furaltadone	0.324	6	0.505	0.0616	0.0935	66
92	atropine	0.31	4	0.602	0.06541	0.0887	75
93	tocainide	0.224	4	0.602	0.06559	0.0828	50
94	lithocholic acid	-0.327	6	-0.499	0.06704	0.0435	66
95	pridinol	-0.236	4	-0.599	0.06728	0.0856	50
96	chloropyramine	-0.377	4	-0.599	0.06785	0.0921	75
97	etynodiol	-0.279	4	-0.595	0.07138	0.0331	75
98	amiloride	-0.246	5	-0.534	0.07197	0.1042	60
99	metrifonate	-0.312	5	-0.534	0.07207	0.0663	60
100	orphenadrine	-0.272	6	-0.493	0.07262	0.0427	66
101	tacrine	-0.2	4	-0.593	0.07362	0.0327	50
102	iocetamic acid	-0.424	4	-0.592	0.0741	0.0441	75
103	deferoxamine	-0.383	8	-0.43	0.07413	0.1656	50
104	diphenylpyraline	-0.255	6	-0.492	0.07419	0.2125	66
105	benfotiamine	-0.269	5	-0.531	0.07492	0.06	60
106	W-13	-0.493	2	-0.804	0.07531	0.0805	100
107	SR-95531	0.325	4	0.586	0.07806	0.0537	75
108	yohimbic acid	-0.278	3	-0.656	0.08114	0.2	66
109	carbamazepine	-0.217	8	-0.424	0.08117	0.0849	50
110	betaxolol	0.231	4	0.582	0.08154	0.0684	75
111	amodiaquine	-0.368	4	-0.584	0.08156	0.0855	75
112	retrorsine	0.201	4	0.581	0.08262	0.035	50
113	piperacillin	-0.242	5	-0.522	0.08325	0.0649	60
114	hydroflumethiazide	0.246	5	0.525	0.08363	0.0509	60
115	oxymetazoline	0.22	4	0.579	0.08425	0.048	75
116	clindamycin	0.221	5	0.524	0.08445	0.0797	60
117	CP-645525-01	-0.515	3	-0.65	0.08569	0.1119	66
118	primidone	0.287	4	0.577	0.08582	0.0469	75
119	isosorbide	-0.427	4	-0.579	0.08588	0.0602	75
120	pepstatin	-0.396	4	-0.578	0.08667	0.0595	75
121	thiamine	0.272	3	0.65	0.08727	0.1048	66
122	coralyne	0.347	4	0.572	0.09035	0.0982	75
123	orciprenaline	0.175	4	0.572	0.09071	0.1047	50
124	chloroquine	-0.355	4	-0.572	0.09268	0.0852	50
125	miconazole	-0.293	5	-0.512	0.09458	0.124	60
126	tolazamide	-0.393	3	-0.64	0.0946	0.0593	66
127	azlocillin	0.327	4	0.567	0.09491	0.0463	75
128	gelsemine	0.185	4	0.566	0.09604	0.0497	50
129	streptomycin	0.269	4	0.565	0.09714	0.1973	75
130	ritodrine	0.208	4	0.564	0.09827	0.0599	50
131	etamsylate	0.32	4	0.563	0.09966	0.1455	75
132	ganciclovir	0.3	4	0.562	0.10032	0.0815	75
133	metanephrine	0.262	5	0.509	0.10107	0.0774	60
134	alclometasone	-0.379	4	-0.563	0.10145	0.0909	75
135	famotidine	0.14	5	0.508	0.10339	0.0373	60
136	clonidine	0.216	4	0.557	0.10605	0.113	75
137	PNU-0251126	-0.251	6	-0.462	0.10778	0.22	66
138	terfenadine	-0.449	3	-0.626	0.10901	0.2569	66
139	chloropyrazine	0.122	4	0.554	0.10911	0.2722	75
140	phenindione	-0.318	4	-0.554	0.11224	0.1784	50
141	cefotetan	-0.482	3	-0.622	0.11337	0.0943	66
142	levamisole	0.188	4	0.55	0.11369	0.1102	50
143	diethylstilbestrol	-0.393	6	-0.458	0.11372	0.2295	50
144	mephenytoin	-0.358	4	-0.552	0.11456	0.1678	75
145	oxybuprocaine	-0.355	4	-0.552	0.11486	0.1573	75
146	niclosamide	-0.354	5	-0.495	0.11653	0.2975	60
147	ranitidine	0.277	5	0.497	0.11681	0.122	60
148	moxonidine	0.348	3	0.618	0.11852	0.1452	66
149	glafenine	-0.449	4	-0.549	0.11856	0.2573	75
150	etamivan	0.194	4	0.545	0.11999	0.1161	50
151	fluvastatin	0.246	4	0.543	0.12184	0.1131	50
152	letrozole	-0.224	4	-0.545	0.1229	0.0347	75
153	demeclocycline	-0.169	6	-0.451	0.12336	0.337	50
154	isoconazole	-0.266	5	-0.49	0.12358	0.1475	60
155	etacrynic acid	0.265	3	0.612	0.12527	0.1724	66
156	epiandrosterone	-0.43	4	-0.542	0.12584	0.1866	75
157	paclitaxel	-0.19	6	-0.449	0.12665	0.2075	66
158	proadifen	-0.382	4	-0.542	0.12678	0.1739	75
159	flavoxate	0.248	4	0.538	0.1294	0.0476	75
160	bemegride	0.296	4	0.535	0.13223	0.0417	75
161	doxepin	-0.333	3	-0.606	0.13316	0.0968	66
162	ethisterone	-0.243	6	-0.444	0.13545	0.121	66
163	nifurtimox	0.25	4	0.532	0.13611	0.1019	75
164	clomifene	-0.441	4	-0.533	0.13786	0.1957	75
165	piribedil	-0.373	4	-0.533	0.13828	0.23	75
166	atracurium besilate	-0.418	3	-0.602	0.13855	0.2662	66
167	betulinic acid	-0.182	4	-0.532	0.13919	0.2839	75
168	vanoxerine	-0.295	4	-0.53	0.14174	0.15	50
169	flucloxacillin	0.048	4	0.527	0.14305	0.0844	50
170	aceclofenac	-0.217	4	-0.529	0.14345	0.1024	50
171	fenoterol	0.262	3	0.597	0.14698	0.1572	66
172	ketotifen	0.282	4	0.524	0.14699	0.2684	50
173	zimeldine	-0.189	5	-0.475	0.14709	0.4396	60
174	ronidazole	0.343	3	0.597	0.1471	0.2178	66
175	alpha-ergocryptine	-0.219	6	-0.435	0.15023	0.142	50
176	pimozide	-0.307	4	-0.52	0.15538	0.354	50
177	mecamylamine	0.258	3	0.591	0.15562	0.1008	66
178	nalbuphine	0.171	5	0.471	0.15666	0.0703	60
179	diphenhydramine	-0.311	5	-0.468	0.15915	0.3259	60
180	levonorgestrel	-0.242	6	-0.43	0.1601	0.4044	50
181	gentamicin	-0.361	4	-0.516	0.16145	0.4474	75
182	dicycloverine	-0.352	5	-0.466	0.16267	0.2901	60
183	amitriptyline	-0.278	6	-0.427	0.16505	0.283	50
184	fusidic acid	0.24	4	0.509	0.16855	0.1307	50
185	butoconazole	-0.229	4	-0.511	0.16867	0.1832	75
186	tenoxicam	-0.315	4	-0.509	0.1707	0.226	75
187	pirenzepine	-0.348	5	-0.461	0.17172	0.1472	60
188	clotrimazole	-0.395	5	-0.461	0.17306	0.2197	60
189	cyclizine	-0.234	4	-0.508	0.17317	0.1615	75
190	securinine	-0.328	4	-0.508	0.17317	0.3228	50
191	zaprinast	0.086	4	0.505	0.17458	0.1611	50
192	kaempferol	0.199	4	0.503	0.17792	0.2135	50
193	5255229	0.178	2	0.697	0.18297	0.1632	50
194	STOCK1N-35696	0.219	2	0.696	0.18404	0.2651	50
195	chenodeoxycholic acid	-0.326	4	-0.5	0.18461	0.5	50
196	loracarbef	0.235	4	0.498	0.18632	0.157	50
197	succinylsulfathiazole	-0.26	4	-0.499	0.18715	0.1353	75
198	foliosidine	-0.286	6	-0.413	0.19332	0.3641	66
199	prasterone	-0.241	4	-0.494	0.19519	0.136	50
200	procarbazine	-0.3	3	-0.566	0.19544	0.0645	66
201	mometasone	-0.362	4	-0.494	0.19553	0.1795	50
202	adipiodone	0.019	4	0.492	0.19612	0.1053	50
203	cefoperazone	-0.446	3	-0.565	0.19618	0.1389	66
204	clofazimine	-0.354	5	-0.448	0.19722	0.3615	60
205	isocorydine	-0.281	4	-0.493	0.1973	0.1225	75
206	abamectin	-0.239	4	-0.491	0.20114	0.2469	50
207	dioxybenzone	-0.169	4	-0.49	0.20173	0.2688	50
208	diazoxide	0.274	5	0.445	0.20497	0.2365	60
209	nitrofurantoin	-0.262	5	-0.444	0.20633	0.2346	60
210	tiletamine	-0.1	4	-0.487	0.20766	0.3409	50
211	tropicamide	-0.188	6	-0.407	0.20822	0.2529	50
212	tetracaine	-0.384	3	-0.556	0.21206	0.2254	66
213	TTNPB	0.202	2	0.674	0.21222	0.2174	50
214	chlorcyclizine	-0.329	6	-0.405	0.21334	0.1071	50
215	paromomycin	0.181	4	0.481	0.2157	0.1437	50
216	labetalol	-0.274	4	-0.483	0.21667	0.1655	50
217	Prestwick-689	0.253	4	0.479	0.21862	0.1679	50
218	latamoxef	0.195	3	0.553	0.21883	0.2319	66
219	11-deoxy-16,16-dimethylprostaglandin E2	-0.384	4	-0.479	0.22338	0.2819	50
220	homochlorcyclizine	-0.288	4	-0.479	0.22423	0.2578	50
221	rescinnamine	-0.45	3	-0.547	0.22965	0.2231	66
222	lomefloxacin	-0.183	6	-0.398	0.23009	0.3539	50
223	metixene	-0.321	4	-0.476	0.23112	0.3231	50
224	pempidine	-0.269	5	-0.431	0.2339	0.3148	60
225	atropine oxide	-0.325	5	-0.43	0.23611	0.1938	60
226	Chicago Sky Blue 6B	-0.289	4	-0.473	0.23687	0.3469	50
227	mesoridazine	-0.225	4	-0.473	0.23778	0.2678	50
228	hymecromone	-0.274	4	-0.473	0.23858	0.1988	50
229	pyrimethamine	-0.292	5	-0.429	0.23929	0.3467	60
230	cyproterone	-0.13	4	-0.472	0.23975	0.4171	50
231	rolitetracycline	-0.276	4	-0.472	0.23975	0.419	50
232	ribostamycin	0.228	4	0.469	0.24033	0.1181	50
233	pentoxifylline	-0.151	5	-0.428	0.24123	0.4328	60
234	hydroxyachillin	0.227	4	0.469	0.24146	0.0621	50
235	dizocilpine	-0.341	5	-0.428	0.24201	0.1757	60
236	phentolamine	-0.259	7	-0.366	0.24281	0.1679	57
237	lincomycin	0.158	3	0.54	0.24467	0.1654	66
238	albendazole	0.151	3	0.538	0.24832	0.3547	66
239	imatinib	0.167	2	0.647	0.24923	0.2901	50
240	amoxicillin	0.076	4	0.464	0.25244	0.3182	50
241	tetrandrine	-0.354	4	-0.466	0.2534	0.2593	50
242	AH-23848	0.139	3	0.535	0.25593	0.1782	66
243	halcinonide	-0.307	5	-0.421	0.25659	0.3354	60
244	melatonin	0.186	4	0.461	0.25761	0.3654	50
245	benzamil	-0.241	6	-0.386	0.25945	0.4387	50
246	ticlopidine	-0.395	5	-0.42	0.25972	0.1931	60
247	sulconazole	-0.202	4	-0.463	0.26038	0.5526	50
248	tonzonium bromide	-0.283	4	-0.46	0.267	0.3879	50
249	idoxuridine	-0.298	5	-0.417	0.26749	0.2276	60
250	bicuculline	0.21	4	0.457	0.26808	0.2741	50
251	isocarboxazid	-0.049	5	0.416	0.26871	0.4379	60
252	indapamide	0.157	6	0.381	0.26902	0.2132	50
253	flufenamic acid	0.149	6	0.381	0.26932	0.3723	50
254	parthenolide	-0.232	4	-0.458	0.26987	0.6138	50
255	talampicillin	0.146	4	0.456	0.27076	0.288	50
256	oxytetracycline	-0.04	3	0.528	0.27099	0.3103	66
257	(-)-atenolol	-0.16	4	-0.457	0.27307	0.2557	50
258	propidium iodide	0.15	4	0.455	0.27363	0.3044	50
259	podophyllotoxin	-0.248	4	-0.457	0.27468	0.7059	50
260	propafenone	0.104	4	0.453	0.27657	0.44	50
261	hydroquinine	0.188	4	0.452	0.28099	0.4211	50
262	raubasine	0.178	4	0.451	0.28286	0.3462	50
263	diclofenamide	0.105	4	0.45	0.28431	0.3427	50
264	calycanthine	0.302	4	0.45	0.28459	0.2959	50
265	tribenoside	-0.285	4	-0.452	0.28521	0.2439	50
266	sisomicin	-0.248	4	-0.452	0.28602	0.2403	50
267	metaraminol	-0.212	4	-0.452	0.28684	0.3296	50
268	fluvoxamine	-0.264	4	-0.451	0.28841	0.345	50
269	ikarugamycin	-0.399	3	-0.518	0.2885	0.3106	66
270	fenofibrate	-0.372	3	-0.518	0.29034	0.4194	66
271	progesterone	0.183	4	0.448	0.29097	0.2883	50
272	chloramphenicol	0.142	4	0.446	0.29432	0.3403	50
273	metyrapone	-0.163	4	-0.448	0.29561	0.4497	50
274	colchicine	-0.258	6	-0.373	0.29568	0.3521	50
275	testosterone	-0.237	5	-0.404	0.29705	0.3355	60
276	nizatidine	-0.228	4	-0.447	0.29762	0.452	50
277	dydrogesterone	0.181	4	0.444	0.29929	0.2987	50
278	praziquantel	0.14	4	0.443	0.30418	0.2763	50
279	mephenesin	-0.232	5	-0.401	0.30492	0.4035	60
280	econazole	-0.209	4	-0.444	0.30579	0.4188	50
281	moroxydine	-0.303	5	-0.4	0.30652	0.4311	60
282	nadolol	-0.316	4	-0.443	0.3087	0.6077	50
283	vinblastine	-0.372	3	-0.509	0.30945	0.5344	66
284	GW-8510	0.127	4	0.441	0.30955	0.8066	50
285	mepacrine	0.288	2	0.606	0.31242	0.349	50
286	tubocurarine chloride	0.129	4	0.439	0.31321	0.1913	50
287	asiaticoside	-0.211	4	-0.441	0.31427	0.268	50
288	minocycline	-0.223	5	-0.397	0.31679	0.3013	60
289	tolazoline	0.102	5	0.396	0.32068	0.2342	60
290	brompheniramine	-0.269	4	-0.438	0.32131	0.2183	50
291	colecalciferol	0.154	4	0.436	0.32193	0.2734	50
292	3-acetylcoumarin	0.14	5	0.395	0.32278	0.296	60
293	fludrocortisone	-0.191	8	-0.318	0.32385	0.6972	50
294	iohexol	-0.19	4	-0.437	0.32439	0.5693	50
295	tobramycin	-0.137	4	-0.437	0.32439	0.6011	50
296	amprolium	0.252	5	0.394	0.32642	0.3077	60
297	estropipate	0.103	4	0.435	0.3266	0.3533	50
298	verteporfin	-0.36	3	-0.501	0.32672	0.6512	66
299	equilin	-0.135	5	-0.393	0.32841	0.3696	60
300	7-aminocephalosporanic acid	0.147	4	0.433	0.33024	0.2848	50
301	eldeline	-0.174	6	-0.359	0.33696	0.5	50
302	thioguanosine	0.115	4	0.43	0.33872	0.7059	50
303	oxantel	0.258	4	0.429	0.34093	0.2917	50
304	esculin	0.141	4	0.428	0.34337	0.2314	50
305	fluoxetine	-0.264	4	-0.429	0.34514	0.3917	50
306	pentoxyverine	0.266	4	0.427	0.34679	0.4174	50
307	proglumide	0.053	5	0.387	0.34683	0.2713	60
308	verapamil	-0.291	6	-0.356	0.34699	0.3125	50
309	netilmicin	0.119	4	0.427	0.34713	0.4071	50
310	CP-944629	0.045	4	0.426	0.34942	0.3385	50
311	sparteine	0.221	4	0.426	0.34986	0.2878	50
312	trimethobenzamide	-0.134	5	-0.386	0.35052	0.6175	60
313	NU-1025	-0.236	2	-0.583	0.35053	0.328	50
314	monastrol	-0.185	8	-0.31	0.3534	0.454	50
315	mesalazine	0.073	5	0.384	0.35566	0.176	60
316	bepridil	-0.207	4	-0.426	0.35604	0.5152	50
317	trimethoprim	-0.175	5	-0.384	0.35626	0.2756	60
318	trimetazidine	-0.223	4	-0.426	0.35658	0.6576	50
319	copper sulfate	-0.251	4	-0.425	0.35736	0.3456	50
320	pindolol	0.078	5	0.383	0.35879	0.6084	60
321	velnacrine	0.256	4	0.422	0.36245	0.2797	50
322	ifenprodil	-0.209	4	-0.423	0.36386	0.6322	50
323	propofol	-0.294	4	-0.423	0.36386	0.3354	50
324	sulfapyridine	-0.257	4	-0.423	0.36549	0.3363	50
325	PHA-00846566E	-0.389	3	-0.485	0.36682	0.3693	66
326	acacetin	0.109	6	0.347	0.37148	0.4428	50
327	monobenzone	-0.115	4	-0.42	0.3716	0.4324	50
328	cloxacillin	0.234	4	0.418	0.37311	0.4286	50
329	nortriptyline	-0.311	4	-0.419	0.37498	0.4672	50
330	pyrazinamide	0.079	4	0.417	0.37522	0.4252	50
331	neostigmine bromide	0.127	4	0.416	0.37749	0.3188	50
332	dropropizine	-0.094	4	-0.418	0.37759	0.442	50
333	flupentixol	-0.194	4	-0.418	0.37807	0.424	50
334	cefalotin	0.123	4	0.415	0.38077	0.3097	50
335	sulfacetamide	-0.094	4	-0.416	0.38467	0.4308	50
336	trimipramine	-0.217	4	-0.415	0.38682	0.315	50
337	isradipine	-0.218	4	-0.415	0.38821	0.3226	50
338	prilocaine	-0.216	6	-0.343	0.38985	0.381	50
339	viomycin	-0.204	4	-0.414	0.39116	0.741	50
340	bethanechol	0.212	4	0.412	0.39239	0.3166	50
341	furosemide	0.265	4	0.411	0.39289	0.5549	50
342	ampicillin	-0.211	4	-0.413	0.39311	0.3585	50
343	Y-27632	0.226	2	0.555	0.39507	0.4574	50
344	zardaverine	0.224	4	0.409	0.39993	0.442	50
345	chlormezanone	-0.217	4	-0.41	0.40104	0.3793	50
346	hydrocortisone	-0.171	3	-0.472	0.40145	0.4605	66
347	piperlongumine	0.205	2	0.551	0.40167	0.5714	50
348	cyanocobalamin	0.239	4	0.407	0.40464	0.2756	50
349	selegiline	0.052	4	0.407	0.40512	0.2839	50
350	milrinone	0.293	3	0.47	0.40572	0.5159	66
351	laudanosine	0.136	4	0.407	0.40793	0.3023	50
352	dexibuprofen	-0.204	4	-0.407	0.40984	0.3295	50
353	acemetacin	0.019	4	0.406	0.40989	0.6685	50
354	glibenclamide	0.22	4	0.405	0.41192	0.4956	50
355	pyrvinium	-0.275	6	-0.336	0.41216	0.6392	50
356	iopromide	-0.324	4	-0.406	0.41497	0.5368	50
357	dextromethorphan	-0.064	4	-0.406	0.4156	0.6498	50
358	(+)-chelidonine	-0.115	4	-0.405	0.41807	0.3385	50
359	meteneprost	-0.294	4	-0.405	0.41807	0.6484	50
360	trimethadione	0.176	4	0.403	0.42004	0.4306	50
361	AG-012559	0.23	3	0.464	0.42028	0.3438	66
362	metitepine	-0.277	4	-0.404	0.42107	0.4696	50
363	tranylcypromine	-0.203	5	-0.363	0.42203	0.67	60
364	harman	-0.219	4	-0.403	0.42547	0.3722	50
365	trifluridine	-0.297	4	-0.402	0.42736	0.4426	50
366	dilazep	-0.191	5	-0.362	0.4279	0.5724	60
367	1,4-chrysenequinone	0.271	2	0.537	0.42872	0.5544	50
368	meclofenoxate	-0.162	6	-0.331	0.43097	0.7228	50
369	cetirizine	0.221	4	0.398	0.43536	0.6095	50
370	etanidazole	0.128	4	0.396	0.44045	0.4264	50
371	pargyline	0.222	4	0.396	0.44232	0.5039	50
372	butein	-0.446	2	-0.529	0.44348	0.4326	50
373	procyclidine	-0.033	4	0.396	0.44353	0.4783	50
374	5253409	-0.349	2	-0.529	0.44376	0.2222	50
375	clebopride	-0.251	4	-0.396	0.4458	0.454	50
376	mebeverine	-0.251	4	-0.396	0.44624	0.4431	50
377	tetraethylenepentamine	0.09	6	0.326	0.44688	0.4307	50
378	berberine	-0.006	4	0.394	0.44936	0.4929	50
379	pentamidine	-0.123	5	-0.354	0.45495	0.442	60
380	piperidolate	0.068	3	0.449	0.45974	0.5508	66
381	suxibuzone	0.174	4	0.39	0.46178	0.3431	50
382	levodopa	-0.136	5	-0.352	0.46354	0.5657	60
383	dimenhydrinate	-0.061	4	-0.39	0.46707	0.446	50
384	bephenium hydroxynaphthoate	-0.119	5	-0.35	0.46969	0.6045	60
385	carbenoxolone	-0.254	4	-0.387	0.47516	0.5094	50
386	moracizine	-0.25	4	-0.387	0.47558	0.5563	50
387	SC-58125	-0.275	4	-0.387	0.47628	0.482	50
388	proxyphylline	0.256	4	0.385	0.47634	0.4636	50
389	thiocolchicoside	0.144	4	0.385	0.47737	0.5608	50
390	exisulind	-0.237	2	-0.511	0.47813	0.3736	50
391	semustine	-0.278	4	-0.385	0.48272	0.7482	50
392	mepyramine	0.104	4	0.382	0.48616	0.4514	50
393	3-nitropropionic acid	0.22	4	0.381	0.49162	0.5115	50
394	tolmetin	-0.273	4	-0.381	0.49537	0.3476	50
395	arachidonyltrifluoromethane	-0.26	2	-0.502	0.49543	0.4771	50
396	noretynodrel	-0.008	4	0.379	0.49551	0.5141	50
397	rifampicin	0.17	4	0.378	0.49969	0.7035	50
398	fluspirilene	-0.325	4	-0.379	0.50104	0.6726	50
399	timolol	-0.26	4	-0.379	0.50146	0.6567	50
400	deptropine	0.19	4	0.378	0.50186	0.6236	50
401	vinpocetine	0.2	4	0.377	0.50375	0.4959	50
402	eticlopride	-0.257	4	-0.378	0.50622	0.6364	50
403	benperidol	-0.197	4	-0.378	0.50731	0.5031	50
404	trimethylcolchicinic acid	-0.344	4	-0.377	0.50773	0.4516	50
405	levopropoxyphene	-0.268	4	-0.377	0.5101	0.6863	50
406	hexylcaine	-0.347	4	-0.375	0.51527	0.4737	50
407	10-methoxyharmalan	-0.313	4	-0.375	0.51712	0.4604	50
408	debrisoquine	-0.23	4	-0.375	0.51712	0.4485	50
409	ondansetron	-0.206	4	-0.374	0.52044	0.6165	50
410	cefamandole	-0.284	4	-0.372	0.52842	0.675	50
411	Prestwick-675	0.243	4	0.37	0.52872	0.678	50
412	piracetam	-0.106	4	-0.371	0.53192	0.4695	50
413	quercetin	-0.252	6	-0.305	0.53393	0.5079	50
414	napelline	0.093	4	0.368	0.53665	0.6074	50
415	hesperidin	0.123	4	0.365	0.54706	0.4161	50
416	methazolamide	0.237	4	0.365	0.54809	0.5189	50
417	felbinac	-0.296	4	-0.366	0.54921	0.7872	50
418	ketoconazole	-0.162	4	-0.365	0.55205	0.441	50
419	cycloserine	0.237	4	0.363	0.55434	0.6615	50
420	corbadrine	0.173	4	0.362	0.55762	0.6291	50
421	quipazine	-0.209	4	-0.363	0.55871	0.6101	50
422	xylazine	0.212	4	0.361	0.56064	0.6393	50
423	estrone	0.202	4	0.36	0.56227	0.4493	50
424	gabexate	-0.144	4	-0.362	0.56265	0.7208	50
425	clomipramine	-0.289	4	-0.361	0.56514	0.7328	50
426	lactobionic acid	0.062	4	0.359	0.56582	0.437	50
427	flecainide	-0.231	6	-0.298	0.56645	0.4638	50
428	metacycline	0.219	4	0.359	0.56703	0.6555	50
429	N6-methyladenosine	0.109	4	0.358	0.56872	0.6228	50
430	hemicholinium	-0.067	4	-0.36	0.56876	0.6056	50
431	Prestwick-692	-0.234	4	-0.359	0.57063	0.7619	50
432	sotalol	0.239	4	0.358	0.57164	0.375	50
433	scopoletin	0.297	2	0.479	0.5779	0.5769	50
434	ceforanide	0.246	4	0.355	0.57968	0.7172	50
435	Prestwick-920	-0.164	4	-0.356	0.58129	0.565	50
436	R-atenolol	0.227	4	0.354	0.58386	0.4065	50
437	cyclobenzaprine	-0.297	4	-0.354	0.58732	0.5167	50
438	dorzolamide	0.098	4	0.353	0.58752	0.5301	50
439	arecoline	-0.138	4	-0.354	0.58802	0.7654	50
440	vinburnine	-0.306	4	-0.353	0.59462	0.6028	50
441	cyclic adenosine monophosphate	-0.134	4	-0.352	0.59631	0.8052	50
442	troleandomycin	-0.072	4	0.35	0.59818	0.6074	50
443	quinostatin	0.272	2	0.474	0.59825	0.7956	50
444	Prestwick-682	0.059	4	0.349	0.60079	0.645	50
445	betonicine	0.04	6	0.289	0.60159	0.6753	50
446	strophanthidin	-0.181	4	-0.35	0.60224	0.618	50
447	dexpanthenol	0.056	4	0.348	0.60662	0.5912	50
448	pilocarpine	0.163	4	0.348	0.60662	0.805	50
449	sertaconazole	-0.171	4	-0.349	0.60674	0.6952	50
450	oxybenzone	-0.28	4	-0.346	0.61613	0.7465	50
451	nipecotic acid	0.194	4	0.345	0.61716	0.6855	50
452	flunisolide	-0.182	6	-0.286	0.61857	0.6588	50
453	scoulerine	0.088	4	0.344	0.62114	0.6684	50
454	staurosporine	-0.246	4	-0.344	0.62283	0.6438	50
455	dimethadione	0.199	4	0.343	0.62444	0.5263	50
456	hexetidine	-0.253	4	-0.343	0.62731	0.7253	50
457	nimodipine	-0.017	4	-0.343	0.62802	0.6	50
458	nilutamide	-0.157	4	-0.342	0.63045	0.6505	50
459	ioversol	0.207	4	0.34	0.63323	0.614	50
460	solasodine	0.101	6	0.281	0.63704	0.6312	50
461	hydrocotarnine	0.343	4	0.338	0.64071	0.8	50
462	fluorocurarine	0.084	4	0.338	0.64155	0.562	50
463	norethisterone	-0.17	4	-0.339	0.64201	0.75	50
464	triflupromazine	-0.186	4	-0.338	0.64382	0.6638	50
465	canadine	0.054	4	0.337	0.64411	0.8773	50
466	stachydrine	-0.146	4	-0.337	0.64785	0.5963	50
467	pyridoxine	0.186	4	0.334	0.65229	0.7122	50
468	5194442	-0.219	4	-0.336	0.65285	0.6561	50
469	canrenoic acid	-0.092	4	0.333	0.6581	0.6565	50
470	alcuronium chloride	0.266	2	0.456	0.65812	0.6222	50
471	buflomedil	-0.057	4	0.333	0.65933	0.6434	50
472	phenazopyridine	-0.283	4	-0.333	0.66007	0.7658	50
473	aminohippuric acid	0.089	4	0.33	0.66703	0.6354	50
474	oxprenolol	0.069	4	0.33	0.6686	0.5909	50
475	cromoglicic acid	0.261	2	0.451	0.67579	0.6565	50
476	fenbufen	-0.266	6	-0.272	0.67745	0.7616	50
477	carbachol	0.044	4	0.326	0.68187	0.7554	50
478	omeprazole	0.182	4	0.325	0.68587	0.7339	50
479	tetroquinone	-0.042	4	0.323	0.69202	0.6596	50
480	5182598	-0.32	2	-0.446	0.69267	0.8554	50
481	butacaine	-0.214	4	-0.323	0.69466	0.7946	50
482	harmol	0.105	4	0.322	0.69514	0.7054	50
483	idazoxan	-0.08	4	-0.321	0.70069	0.7446	50
484	meptazinol	0.099	4	0.319	0.70377	0.7087	50
485	propranolol	0.08	4	0.319	0.70431	0.6515	50
486	co-dergocrine mesilate	-0.112	4	-0.319	0.70779	0.7895	50
487	benfluorex	-0.156	4	-0.319	0.70889	0.6286	50
488	citalopram	0.188	4	0.316	0.714	0.7798	50
489	convolamine	-0.254	4	-0.316	0.71772	0.7351	50
490	5707885	-0.251	4	-0.316	0.71814	0.7815	50
491	natamycin	0.192	4	0.314	0.72088	0.8174	50
492	capsaicin	-0.139	4	-0.315	0.72229	0.7814	50
493	Prestwick-1080	0.21	4	0.313	0.72263	0.7594	50
494	doxazosin	-0.063	4	-0.313	0.72767	0.9385	50
495	gibberellic acid	-0.175	4	-0.311	0.73415	0.7005	50
496	Prestwick-674	-0.074	6	-0.259	0.73436	0.8554	50
497	niridazole	0.055	4	0.309	0.73773	0.6667	50
498	ramifenazone	-0.041	4	0.309	0.73831	0.7161	50
499	iopamidol	-0.126	4	-0.309	0.74048	0.8758	50
500	pergolide	-0.126	4	-0.309	0.74141	0.7482	50
501	spectinomycin	-0.208	4	-0.308	0.74374	0.6369	50
502	imipramine	-0.175	4	-0.308	0.74471	0.7153	50
503	MK-886	0.18	2	0.428	0.74544	0.7764	50
504	harmine	0.186	4	0.303	0.75508	0.8855	50
505	cytisine	-0.053	4	-0.303	0.76011	0.755	50
506	pizotifen	-0.335	4	-0.302	0.76343	0.7672	50
507	telenzepine	-0.163	4	-0.302	0.76395	0.7069	50
508	azaperone	0.083	4	0.3	0.76652	0.7552	50
509	metoprolol	0.023	4	0.298	0.77302	0.8729	50
510	enalapril	-0.123	4	-0.296	0.78219	0.6627	50
511	lymecycline	-0.307	4	-0.295	0.78394	0.8844	50
512	clidinium bromide	-0.16	4	-0.294	0.78599	0.8037	50
513	hycanthone	-0.235	4	-0.294	0.78812	0.8151	50
514	gabapentin	0.214	4	0.293	0.78818	0.7273	50
515	mexiletine	-0.136	6	-0.244	0.79216	0.7765	50
516	racecadotril	0.074	4	0.292	0.7922	0.7885	50
517	betahistine	0.094	4	0.291	0.79337	0.8832	50
518	nimesulide	-0.104	4	-0.291	0.79542	0.8387	50
519	picrotoxinin	-0.011	4	0.289	0.79944	0.7634	50
520	tridihexethyl	0.167	4	0.289	0.79986	0.8158	50
521	pronetalol	-0.107	4	-0.29	0.80077	0.83	50
522	megestrol	-0.109	4	-0.289	0.80292	0.8163	50
523	galantamine	0.149	4	0.288	0.80322	0.8504	50
524	theophylline	-0.103	4	-0.286	0.81124	0.7697	50
525	PF-01378883-00	-0.079	4	-0.285	0.81396	0.7746	50
526	DL-thiorphan	0.169	2	0.4	0.82111	0.8456	50
527	metrizamide	-0.228	4	-0.281	0.82534	0.8735	50
528	naftidrofuryl	-0.097	4	-0.28	0.82932	0.7451	50
529	STOCK1N-35874	-0.277	2	-0.394	0.83335	0.8344	50
530	sanguinarine	-0.052	2	0.39	0.84298	0.9408	50
531	nisoxetine	-0.182	4	-0.272	0.85166	0.9024	50
532	urapidil	-0.106	4	-0.271	0.85615	0.8824	50
533	niflumic acid	-0.105	4	-0.27	0.85717	0.8636	50
534	zalcitabine	-0.124	4	-0.267	0.86622	0.8355	50
535	primaquine	-0.22	4	-0.265	0.87024	0.9074	50
536	bacampicillin	-0.132	4	-0.264	0.87263	0.8593	50
537	5230742	0.004	2	0.373	0.87856	0.845	50
538	streptozocin	-0.028	4	-0.262	0.87895	0.9375	50
539	depudecin	-0.264	2	-0.373	0.87954	0.8224	50
540	mercaptopurine	-0.259	2	-0.372	0.88169	0.9041	50
541	domperidone	-0.173	4	-0.26	0.88408	0.8372	50
542	dyclonine	-0.115	4	-0.26	0.88476	0.875	50
543	fasudil	-0.062	2	-0.317	0.96338	0.9774	50
544	phenyl biguanide	-0.807	1	-0.994	1	1	100
545	splitomicin	0.534	1	0.958	1	1	100
546	MG-132	-0.663	1	-0.957	1	1	100
547	2-deoxy-D-glucose	-0.649	1	-0.951	1	1	100
548	5162773	0.507	1	0.943	1	1	100
549	5151277	0.489	1	0.932	1	1	100
550	5213008	0.486	1	0.93	1	1	100
551	3-aminobenzamide	-0.548	1	-0.889	1	1	100
552	tyrphostin AG-1478	-0.522	1	-0.868	1	1	100
553	gefitinib	-0.517	1	-0.864	1	1	100
554	cytochalasin B	-0.488	1	-0.84	1	1	100
555	fisetin	0.359	1	0.827	1	1	100
556	DL-PPMP	0.357	1	0.824	1	1	100
557	5152487	0.349	1	0.817	1	1	100
558	5286656	-0.457	1	-0.811	1	1	100
559	decitabine	0.33	1	0.805	1	1	100
560	12,13-EODE	0.328	1	0.803	1	1	100
561	(-)-catechin	-0.406	1	-0.777	1	1	100
562	HC toxin	0	1	0.769	1	1	0
563	oligomycin	-0.393	1	-0.769	1	1	100
564	N-phenylanthranilic acid	-0.387	1	-0.766	1	1	100
565	5109870	0	1	0.763	1	1	0
566	demecolcine	-0.374	1	-0.76	1	1	100
567	5186324	-0.36	1	-0.756	1	1	100
568	tyrphostin AG-825	0	1	0.742	1	1	0
569	oxamic acid	0	1	-0.733	1	1	0
570	5666823	0	1	0.731	1	1	0
571	camptothecin	0	3	0.727	1	1	0
572	5140203	0	1	0.724	1	1	0
573	tioguanine	0	1	0.718	1	1	0
574	scriptaid	0	3	0.705	1	1	0
575	cantharidin	0	1	-0.697	1	1	0
576	irinotecan	0	3	0.697	1	1	0
577	5186223	0	1	-0.685	1	1	0
578	dimethyloxalylglycine	0	1	0.683	1	1	0
579	ipratropium bromide	0.233	3	0.682	1	1	33
580	Prestwick-1082	0.216	3	0.68	1	1	33
581	levomepromazine	0	4	0.675	1	1	0
582	pararosaniline	0	1	0.673	1	1	0
583	phenanthridinone	0	1	-0.67	1	1	0
584	PHA-00665752	0	1	0.666	1	1	0
585	adrenosterone	-0.121	4	-0.665	1	1	25
586	MS-275	0	2	0.661	1	1	0
587	HNMPA-(AM)3	0	1	0.66	1	1	0
588	ciclopirox	0	4	0.652	1	1	0
589	ellipticine	0.162	4	0.651	1	1	25
590	theobromine	-0.167	4	-0.65	1	1	25
591	celastrol	0	1	0.65	1	1	0
592	5149715	0	1	0.646	1	1	0
593	menadione	0	2	0.641	1	1	0
594	digoxigenin	0.156	5	0.638	1	1	20
595	exemestane	0	1	-0.635	1	1	0
596	SB-203580	-0.106	5	-0.627	1	1	20
597	crotamiton	-0.09	4	-0.624	1	1	25
598	azacitidine	0	3	0.622	1	1	0
599	trazodone	0	3	0.621	1	1	0
600	4,5-dianilinophthalimide	0	2	-0.618	1	1	0
601	etomidate	-0.215	3	-0.617	1	1	33
602	5155877	0	4	0.617	1	1	0
603	blebbistatin	0	2	0.617	1	1	0
604	glimepiride	0.109	4	0.613	1	1	25
605	calmidazolium	0	2	0.611	1	1	0
606	docosahexaenoic acid ethyl ester	0	2	0.608	1	1	0
607	ofloxacin	-0.068	5	-0.608	1	1	20
608	isopropamide iodide	0	4	-0.608	1	1	0
609	BW-B70C	0	1	0.606	1	1	0
610	mevalolactone	0.152	3	0.603	1	1	33
611	sulfathiazole	0	5	-0.602	1	1	0
612	16,16-dimethylprostaglandin E2	0.172	3	0.599	1	1	33
613	etifenin	0.111	4	0.598	1	1	25
614	vorinostat	0.135	12	0.591	1	1	25
615	iloprost	0	3	0.591	1	1	0
616	quinethazone	-0.14	4	-0.587	1	1	25
617	trapidil	-0.157	3	-0.585	1	1	33
618	lobelanidine	0.089	4	0.584	1	1	25
619	ethambutol	-0.197	5	-0.582	1	1	40
620	atropine methonitrate	-0.133	3	-0.581	1	1	33
621	5114445	0	1	0.581	1	1	0
622	penbutolol	0.141	3	0.581	1	1	33
623	epirizole	-0.222	5	-0.58	1	1	40
624	dopamine	0	1	-0.578	1	1	0
625	isometheptene	0.105	4	0.577	1	1	25
626	alsterpaullone	0.168	3	0.576	1	1	33
627	paracetamol	-0.122	4	-0.576	1	1	25
628	(-)-isoprenaline	0.161	4	0.574	1	1	25
629	topiramate	0	1	0.573	1	1	0
630	buspirone	-0.122	4	-0.568	1	1	25
631	repaglinide	-0.175	4	-0.566	1	1	25
632	tomelukast	0	1	-0.565	1	1	0
633	levobunolol	-0.14	4	-0.563	1	1	25
634	erastin	0	4	0.561	1	1	0
635	lycorine	0	5	-0.561	1	1	0
636	5279552	0	2	0.559	1	1	0
637	oxyphenbutazone	0	4	0.558	1	1	0
638	proscillaridin	0.174	3	0.558	1	1	33
639	norcyclobenzaprine	0	4	0.557	1	1	0
640	dexverapamil	0	1	-0.556	1	1	0
641	sulindac sulfide	0	1	0.552	1	1	0
642	tyloxapol	0	4	-0.551	1	1	0
643	morantel	-0.11	5	-0.55	1	1	20
644	nalidixic acid	-0.128	5	-0.55	1	1	20
645	benzethonium chloride	0.23	3	0.549	1	1	33
646	gliclazide	-0.11	4	-0.548	1	1	25
647	phenelzine	-0.157	6	-0.547	1	1	33
648	sulfamethizole	-0.126	4	-0.546	1	1	25
649	myricetin	0	4	0.546	1	1	0
650	iobenguane	-0.185	4	-0.544	1	1	25
651	STOCK1N-35215	0	3	0.544	1	1	0
652	maprotiline	0	4	0.542	1	1	0
653	syrosingopine	0	4	0.539	1	1	0
654	chlorzoxazone	0	4	-0.539	1	1	0
655	MG-262	0	3	0.539	1	1	0
656	perphenazine	0	5	0.538	1	1	0
657	bufexamac	0.095	4	0.538	1	1	25
658	ketorolac	-0.126	4	-0.538	1	1	25
659	piromidic acid	-0.107	4	-0.536	1	1	25
660	riboflavin	0	4	-0.535	1	1	0
661	triprolidine	0.097	4	0.531	1	1	25
662	triamcinolone	0	5	-0.527	1	1	0
663	parbendazole	-0.089	4	-0.526	1	1	25
664	nystatin	0	3	0.525	1	1	0
665	monocrotaline	-0.174	4	-0.524	1	1	25
666	benzathine benzylpenicillin	0	4	0.522	1	1	0
667	cefapirin	0	4	-0.522	1	1	0
668	5224221	0	2	0.521	1	1	0
669	vigabatrin	0.169	3	0.52	1	1	33
670	guanethidine	0	3	-0.519	1	1	0
671	flunarizine	-0.171	4	-0.519	1	1	25
672	Prestwick-559	-0.167	3	-0.519	1	1	33
673	digitoxigenin	0.138	4	0.516	1	1	25
674	fipexide	0.182	3	0.516	1	1	33
675	clemastine	0.154	3	0.515	1	1	33
676	prednisone	0.087	5	0.515	1	1	40
677	rifabutin	0.227	3	0.513	1	1	33
678	nomegestrol	-0.138	3	-0.513	1	1	33
679	1,5-isoquinolinediol	0	1	0.513	1	1	0
680	lysergol	0	4	-0.511	1	1	0
681	cefsulodin	-0.151	4	-0.51	1	1	25
682	U0125	0	1	-0.509	1	1	0
683	ceftazidime	0.141	3	0.508	1	1	33
684	5252917	0	2	-0.507	1	1	0
685	sulmazole	0	3	-0.507	1	1	0
686	dl-alpha tocopherol	0	4	-0.506	1	1	0
687	AH-6809	0	2	-0.506	1	1	0
688	procaine	0	5	-0.505	1	1	0
689	fluocinonide	-0.087	5	-0.505	1	1	20
690	PF-00539745-00	0	3	0.503	1	1	0
691	2,6-dimethylpiperidine	-0.032	5	-0.5	1	1	40
692	proguanil	-0.22	3	-0.499	1	1	33
693	ursolic acid	0	4	0.496	1	1	0
694	5211181	0	2	0.496	1	1	0
695	protoveratrine A	0	4	-0.494	1	1	0
696	ifosfamide	-0.166	3	-0.493	1	1	33
697	Prestwick-981	0	3	0.492	1	1	0
698	furazolidone	0	4	-0.492	1	1	0
699	Prestwick-1103	0.179	4	0.488	1	1	25
700	lisuride	0.082	5	0.487	1	1	20
701	0316684-0000	0.108	4	0.487	1	1	25
702	etidronic acid	-0.097	4	-0.487	1	1	25
703	LM-1685	0.156	3	0.487	1	1	33
704	benzocaine	-0.121	4	-0.487	1	1	25
705	dienestrol	-0.218	3	-0.485	1	1	33
706	octopamine	-0.158	4	-0.485	1	1	25
707	suloctidil	0.17	4	0.485	1	1	25
708	cefazolin	-0.065	5	-0.484	1	1	20
709	0297417-0002B	0.129	3	0.484	1	1	33
710	Prestwick-1084	0	4	-0.482	1	1	0
711	diprophylline	0.178	5	0.481	1	1	40
712	AG-013608	0.099	8	0.478	1	1	25
713	enilconazole	0.143	4	0.477	1	1	25
714	trichostatin A	0.038	182	0.475	1	1	11
715	sulfamethoxypyridazine	-0.141	5	-0.475	1	1	40
716	oxolamine	0.127	4	0.475	1	1	25
717	diperodon	-0.278	3	-0.474	1	1	33
718	difenidol	0.205	3	0.474	1	1	33
719	tetrahydroalstonine	-0.133	4	-0.472	1	1	25
720	PF-00539758-00	0	3	0.471	1	1	0
721	H-7	0.134	4	0.469	1	1	25
722	amiprilose	-0.005	4	-0.469	1	1	25
723	thiostrepton	-0.097	4	0.468	1	1	25
724	canavanine	0	3	-0.468	1	1	0
725	mepenzolate bromide	0.153	5	0.466	1	1	40
726	bergenin	-0.098	4	-0.465	1	1	25
727	cortisone	0.148	3	0.465	1	1	33
728	clopamide	0.083	4	0.464	1	1	25
729	etilefrine	0	4	0.462	1	1	0
730	roxithromycin	-0.136	4	-0.46	1	1	25
731	dexpropranolol	0.156	3	0.46	1	1	33
732	ergocalciferol	0.104	4	0.46	1	1	25
733	dipivefrine	-0.117	4	0.459	1	1	0
734	palmatine	0.011	4	-0.457	1	1	25
735	pyrithyldione	0	4	0.457	1	1	0
736	pancuronium bromide	0.142	4	0.456	1	1	25
737	clenbuterol	0.145	5	0.456	1	1	40
738	(+/-)-catechin	-0.113	4	-0.456	1	1	25
739	methocarbamol	0	3	0.455	1	1	0
740	ursodeoxycholic acid	0.163	3	0.454	1	1	33
741	cisapride	-0.029	4	0.452	1	1	25
742	fluorometholone	0	4	-0.452	1	1	0
743	aminocaproic acid	0	3	-0.45	1	1	0
744	amylocaine	-0.182	5	-0.45	1	1	40
745	thioperamide	0.026	5	0.448	1	1	20
746	halofantrine	0	3	-0.447	1	1	0
747	propoxycaine	-0.099	4	0.446	1	1	0
748	mycophenolic acid	0.191	3	0.446	1	1	33
749	altretamine	-0.107	4	-0.446	1	1	25
750	vitexin	0.096	4	0.445	1	1	25
751	risperidone	0.145	3	0.445	1	1	33
752	beclometasone	-0.151	3	-0.445	1	1	33
753	N-acetyl-L-leucine	-0.063	4	-0.444	1	1	25
754	IC-86621	-0.117	4	-0.443	1	1	25
755	flunixin	-0.098	5	-0.442	1	1	20
756	tetryzoline	0.161	3	0.441	1	1	33
757	dobutamine	-0.155	4	-0.44	1	1	25
758	hydrastinine	0	5	-0.44	1	1	0
759	ciprofloxacin	-0.097	5	-0.439	1	1	40
760	cefuroxime	-0.143	4	-0.438	1	1	25
761	alvespimycin	0.169	12	0.438	1	1	33
762	ketanserin	0.134	4	0.436	1	1	25
763	piretanide	0.08	4	0.435	1	1	25
764	nomifensine	0	5	0.435	1	1	0
765	betulin	0.01	3	0.431	1	1	33
766	scopolamine	-0.128	4	-0.43	1	1	25
767	benzonatate	-0.233	5	-0.43	1	1	40
768	sulfaquinoxaline	0.129	3	0.429	1	1	33
769	disopyramide	0.114	4	0.429	1	1	25
770	clorgiline	-0.08	4	0.428	1	1	0
771	tinidazole	-0.104	6	-0.428	1	1	33
772	bisacodyl	0	4	0.424	1	1	0
773	iproniazid	0.176	5	0.424	1	1	40
774	nitrendipine	-0.235	5	-0.424	1	1	40
775	ivermectin	0	5	0.423	1	1	0
776	khellin	0.066	5	0.423	1	1	20
777	lorglumide	0.064	5	-0.423	1	1	0
778	nicardipine	-0.132	4	-0.422	1	1	25
779	bromperidol	0	3	0.422	1	1	0
780	diltiazem	-0.172	5	-0.421	1	1	40
781	pioglitazone	0.071	11	0.421	1	1	36
782	prednicarbate	0	3	0.42	1	1	0
783	tolbutamide	-0.151	7	-0.42	1	1	28
784	geldanamycin	0.115	15	0.419	1	1	26
785	piroxicam	-0.09	4	-0.419	1	1	25
786	tomatidine	0	4	-0.419	1	1	0
787	meclocycline	-0.136	4	-0.418	1	1	25
788	torasemide	0	4	-0.418	1	1	0
789	tacrolimus	-0.161	3	-0.417	1	1	33
790	chlorambucil	-0.145	4	-0.416	1	1	25
791	pentetic acid	-0.204	5	-0.416	1	1	40
792	doxorubicin	0.177	3	0.416	1	1	33
793	aminoglutethimide	0	3	0.415	1	1	0
794	methapyrilene	0.101	4	0.415	1	1	25
795	BAS-012416453	0	3	-0.414	1	1	0
796	6-bromoindirubin-3'-oxime	0.096	7	0.414	1	1	28
797	benzydamine	0.098	4	0.414	1	1	25
798	acetazolamide	-0.066	4	-0.413	1	1	25
799	Prestwick-860	-0.001	4	-0.413	1	1	25
800	yohimbine	-0.028	5	-0.413	1	1	40
801	carbimazole	0.121	3	0.412	1	1	33
802	methyldopa	0.162	5	0.412	1	1	40
803	alfadolone	0	3	-0.412	1	1	0
804	Prestwick-691	-0.159	3	-0.411	1	1	33
805	apomorphine	-0.284	5	-0.408	1	1	40
806	altizide	0	4	-0.408	1	1	0
807	bisoprolol	0.131	4	0.407	1	1	25
808	bambuterol	0.012	4	-0.407	1	1	25
809	aztreonam	0.07	5	0.407	1	1	20
810	chlortalidone	0.087	4	0.407	1	1	25
811	benserazide	0.105	5	0.406	1	1	20
812	ambroxol	0.078	4	0.406	1	1	25
813	bucladesine	-0.147	6	-0.405	1	1	33
814	bromocriptine	-0.024	5	0.404	1	1	40
815	pivmecillinam	0	4	0.404	1	1	0
816	rotenone	-0.192	4	-0.403	1	1	25
817	SC-560	-0.156	3	-0.403	1	1	33
818	azacyclonol	-0.284	5	-0.402	1	1	40
819	epivincamine	0.089	4	-0.402	1	1	25
820	naftopidil	-0.013	3	-0.401	1	1	33
821	vidarabine	0	4	0.4	1	1	0
822	ajmaline	0	3	-0.396	1	1	0
823	hexamethonium bromide	-0.17	5	-0.396	1	1	40
824	cefotaxime	0.115	5	0.395	1	1	20
825	aminophenazone	0	5	-0.395	1	1	0
826	mifepristone	0	4	-0.394	1	1	0
827	8-azaguanine	-0.202	4	-0.394	1	1	25
828	leflunomide	-0.147	4	-0.394	1	1	25
829	AG-028671	0	3	-0.39	1	1	0
830	6-azathymine	0	4	0.389	1	1	0
831	mefloquine	0.121	5	0.388	1	1	20
832	calcium folinate	-0.04	5	0.388	1	1	20
833	ozagrel	-0.117	4	0.387	1	1	25
834	meropenem	0	4	-0.387	1	1	0
835	S-propranolol	0.127	4	0.387	1	1	25
836	fusaric acid	0	4	-0.387	1	1	0
837	carteolol	0.155	4	0.386	1	1	25
838	dacarbazine	-0.014	4	-0.386	1	1	25
839	physostigmine	0.028	4	-0.386	1	1	25
840	triflusal	0.154	3	0.385	1	1	33
841	F0447-0125	-0.16	4	-0.385	1	1	25
842	anabasine	0.039	3	-0.383	1	1	33
843	bupivacaine	0.105	4	0.383	1	1	25
844	carisoprodol	0.098	4	0.382	1	1	25
845	cyproheptadine	-0.193	5	-0.382	1	1	40
846	H-89	0	3	-0.381	1	1	0
847	levocabastine	-0.101	4	-0.381	1	1	25
848	vincamine	-0.161	6	-0.38	1	1	33
849	allantoin	0.118	5	0.379	1	1	40
850	thiamphenicol	-0.083	5	-0.379	1	1	40
851	cyclopenthiazide	0	4	0.379	1	1	0
852	CP-690334-01	-0.101	8	-0.379	1	1	37
853	aciclovir	0.056	6	0.379	1	1	33
854	orlistat	0.156	5	0.378	1	1	40
855	clofilium tosylate	-0.251	3	-0.378	1	1	33
856	ebselen	-0.167	3	-0.377	1	1	33
857	mianserin	-0.233	5	-0.377	1	1	40
858	mebhydrolin	-0.137	4	0.377	1	1	0
859	dihydrostreptomycin	-0.21	5	-0.377	1	1	40
860	Prestwick-665	0.086	5	0.376	1	1	20
861	colistin	-0.12	4	-0.376	1	1	25
862	imipenem	-0.011	4	-0.375	1	1	25
863	mimosine	0	3	0.375	1	1	0
864	sulpiride	0.197	5	0.375	1	1	40
865	ascorbic acid	-0.155	4	-0.375	1	1	25
866	articaine	-0.075	3	-0.375	1	1	33
867	loxapine	-0.153	4	-0.375	1	1	25
868	SB-202190	0.186	5	0.374	1	1	40
869	picotamide	0.068	5	0.373	1	1	40
870	pirenperone	-0.067	5	0.372	1	1	40
871	2-aminobenzenesulfonamide	-0.164	4	-0.371	1	1	25
872	dinoprost	0.036	4	0.37	1	1	25
873	cefalonium	0.008	3	-0.37	1	1	33
874	quinpirole	0.077	4	0.369	1	1	25
875	cobalt chloride	-0.185	3	-0.369	1	1	33
876	sulfaguanidine	0.156	5	0.367	1	1	40
877	ioxaglic acid	-0.183	3	-0.367	1	1	33
878	Prestwick-972	0	3	-0.367	1	1	0
879	arachidonic acid	-0.09	3	-0.366	1	1	33
880	florfenicol	-0.113	4	-0.365	1	1	25
881	thalidomide	-0.139	7	-0.365	1	1	28
882	antazoline	0	4	-0.365	1	1	0
883	tetramisole	-0.055	4	-0.364	1	1	25
884	sulfadimidine	-0.079	6	-0.364	1	1	16
885	chrysin	-0.099	3	-0.364	1	1	33
886	nefopam	-0.172	5	-0.363	1	1	40
887	zomepirac	0.079	4	0.363	1	1	25
888	dihydroergotamine	0.06	5	0.362	1	1	40
889	molindone	0.095	4	0.362	1	1	25
890	diloxanide	0.08	4	0.362	1	1	25
891	amoxapine	-0.2	5	-0.362	1	1	40
892	aminophylline	0.091	4	-0.361	1	1	0
893	quinidine	0	3	-0.361	1	1	0
894	probucol	-0.102	6	-0.36	1	1	16
895	amrinone	0.118	4	0.359	1	1	25
896	droperidol	-0.037	4	0.359	1	1	25
897	piperine	0	4	-0.359	1	1	0
898	fursultiamine	0.088	4	-0.358	1	1	0
899	salsolinol	-0.15	3	-0.358	1	1	33
900	glipizide	0.058	5	0.356	1	1	20
901	lumicolchicine	0.101	3	0.356	1	1	33
902	0225151-0000	0.137	3	0.355	1	1	33
903	reserpine	-0.199	3	-0.355	1	1	33
904	sulfadiazine	0	5	-0.355	1	1	0
905	biotin	-0.153	3	-0.355	1	1	33
906	metolazone	-0.232	5	-0.354	1	1	40
907	acebutolol	-0.075	5	-0.354	1	1	20
908	molsidomine	-0.046	4	-0.354	1	1	25
909	sulfachlorpyridazine	0	5	0.353	1	1	0
910	pimethixene	-0.194	3	-0.353	1	1	33
911	isoxsuprine	0.143	5	0.353	1	1	40
912	loperamide	-0.096	6	-0.353	1	1	16
913	riluzole	0.14	5	0.353	1	1	40
914	atractyloside	-0.078	5	-0.352	1	1	20
915	butirosin	0.109	4	0.352	1	1	25
916	acetohexamide	0	4	-0.352	1	1	0
917	biperiden	-0.096	5	-0.351	1	1	20
918	apigenin	0.139	4	0.351	1	1	25
919	zuclopenthixol	-0.013	4	0.351	1	1	25
920	alprostadil	0.015	7	0.351	1	1	14
921	metamizole sodium	0.082	6	-0.351	1	1	0
922	decamethonium bromide	-0.094	4	-0.35	1	1	25
923	piperacetazine	-0.007	4	0.35	1	1	25
924	methoxsalen	0.141	3	0.35	1	1	33
925	mestranol	-0.184	4	-0.349	1	1	25
926	felodipine	-0.264	7	-0.349	1	1	42
927	glycocholic acid	-0.046	4	-0.348	1	1	25
928	protriptyline	-0.142	4	-0.348	1	1	25
929	butamben	-0.224	4	-0.348	1	1	25
930	carbarsone	0.107	4	0.348	1	1	25
931	methotrexate	0.075	8	0.347	1	1	12
932	liothyronine	-0.06	4	-0.347	1	1	25
933	disulfiram	-0.271	5	-0.347	1	1	40
934	valdecoxib	0.116	3	0.346	1	1	33
935	calcium pantothenate	0.017	4	-0.345	1	1	25
936	meticrane	-0.053	5	-0.344	1	1	20
937	bretylium tosilate	-0.004	4	-0.344	1	1	25
938	brinzolamide	0.111	4	0.344	1	1	25
939	tiabendazole	0.121	4	0.344	1	1	25
940	0173570-0000	0	6	0.344	1	1	0
941	iodixanol	0	3	-0.343	1	1	0
942	myosmine	-0.147	6	-0.343	1	1	33
943	griseofulvin	0.075	5	0.343	1	1	20
944	methyldopate	0.005	4	0.343	1	1	25
945	Prestwick-685	-0.112	5	-0.342	1	1	20
946	guanabenz	0.062	5	0.342	1	1	20
947	minoxidil	-0.14	5	-0.342	1	1	40
948	thioproperazine	-0.152	5	-0.342	1	1	40
949	lasalocid	-0.065	4	0.342	1	1	25
950	carcinine	0.147	4	0.342	1	1	25
951	midecamycin	-0.103	5	-0.341	1	1	40
952	sulfamonomethoxine	0	4	-0.341	1	1	0
953	sitosterol	0.125	4	0.34	1	1	25
954	norfloxacin	-0.037	5	-0.34	1	1	20
955	fenspiride	0.115	5	0.339	1	1	40
956	phenylpropanolamine	-0.119	4	0.339	1	1	0
957	azapropazone	-0.132	3	-0.339	1	1	33
958	tanespimycin	0.103	62	0.338	1	1	30
959	tolfenamic acid	0.103	4	0.338	1	1	25
960	pentetrazol	0.103	4	0.338	1	1	25
961	remoxipride	-0.088	4	-0.337	1	1	25
962	salbutamol	-0.076	5	0.337	1	1	20
963	harmalol	-0.026	3	-0.337	1	1	33
964	pseudopelletierine	0.141	4	0.337	1	1	25
965	sulfametoxydiazine	0.079	4	-0.337	1	1	0
966	chlorprothixene	0	4	0.336	1	1	0
967	isoetarine	0.1	4	0.336	1	1	25
968	pheneticillin	0.085	4	0.336	1	1	25
969	tiaprofenic acid	-0.141	4	-0.336	1	1	25
970	isotretinoin	-0.16	4	0.336	1	1	0
971	desoxycortone	0.084	4	0.335	1	1	25
972	serotonin	0.156	5	0.335	1	1	40
973	sulfamethoxazole	-0.002	5	-0.334	1	1	20
974	isoniazid	0.207	5	0.334	1	1	40
975	etofylline	-0.079	5	-0.333	1	1	40
976	BCB000039	0.121	3	0.333	1	1	33
977	triamterene	-0.262	5	-0.333	1	1	40
978	anisomycin	0.163	4	0.333	1	1	25
979	diflorasone	0	4	-0.332	1	1	0
980	kawain	-0.245	5	-0.332	1	1	40
981	dapsone	-0.02	5	0.332	1	1	20
982	ouabain	0.038	4	0.332	1	1	25
983	Prestwick-1083	0.176	3	0.331	1	1	33
984	sulfinpyrazone	0.083	4	-0.331	1	1	0
985	oleandomycin	-0.083	5	0.33	1	1	40
986	oxetacaine	-0.028	5	0.33	1	1	20
987	azathioprine	-0.132	7	-0.33	1	1	28
988	estriol	0.154	4	0.329	1	1	25
989	CP-863187	-0.032	4	0.329	1	1	25
990	cinnarizine	0.143	4	0.328	1	1	25
991	gemfibrozil	0.144	5	0.328	1	1	40
992	oxaprozin	0.064	6	0.328	1	1	16
993	nitrofural	-0.175	4	-0.328	1	1	25
994	pyrantel	0.146	5	0.328	1	1	40
995	nabumetone	-0.005	4	0.327	1	1	25
996	paroxetine	0	4	-0.327	1	1	0
997	guanfacine	-0.009	5	-0.327	1	1	40
998	tiapride	0.078	5	0.327	1	1	20
999	fendiline	-0.001	3	0.327	1	1	33
1000	edrophonium chloride	0.113	5	0.327	1	1	20
1001	probenecid	0	4	0.326	1	1	0
1002	suramin sodium	0	4	0.325	1	1	0
1003	tropine	0	4	0.324	1	1	0
1004	cefixime	-0.049	4	-0.323	1	1	25
1005	xamoterol	-0.179	3	-0.323	1	1	33
1006	lidocaine	0.055	5	0.323	1	1	40
1007	alfuzosin	0.148	5	0.323	1	1	40
1008	etodolac	0.098	5	0.323	1	1	20
1009	hydroxyzine	0.062	5	0.323	1	1	40
1010	atovaquone	0.216	3	0.323	1	1	33
1011	butyl hydroxybenzoate	-0.023	5	0.322	1	1	40
1012	ethoxyquin	-0.114	5	-0.322	1	1	20
1013	skimmianine	0.105	4	0.321	1	1	25
1014	CP-319743	-0.069	4	0.321	1	1	25
1015	medrysone	-0.071	6	-0.32	1	1	33
1016	tranexamic acid	-0.135	5	-0.32	1	1	40
1017	cinchonidine	0.031	4	-0.32	1	1	25
1018	gallamine triethiodide	0.134	5	0.319	1	1	40
1019	prednisolone	-0.054	5	-0.319	1	1	20
1020	metergoline	-0.146	4	0.319	1	1	0
1021	Trolox C	-0.056	4	-0.319	1	1	25
1022	cefalexin	0.159	5	0.318	1	1	40
1023	hydrastine hydrochloride	0	4	-0.318	1	1	0
1024	methacholine chloride	0.146	3	0.317	1	1	33
1025	aconitine	-0.12	4	-0.317	1	1	25
1026	clioquinol	-0.258	5	-0.317	1	1	40
1027	arcaine	0.127	4	-0.317	1	1	0
1028	harpagoside	-0.153	4	0.317	1	1	0
1029	delsoline	0.094	4	-0.317	1	1	0
1030	salsolidin	0.021	4	-0.317	1	1	25
1031	harmaline	0.107	4	0.316	1	1	25
1032	cefaclor	-0.129	4	-0.316	1	1	25
1033	dirithromycin	0.116	3	0.316	1	1	33
1034	neomycin	-0.03	5	0.315	1	1	40
1035	folic acid	0	4	0.315	1	1	0
1036	moxisylyte	-0.061	5	-0.315	1	1	20
1037	acepromazine	0	4	0.314	1	1	25
1038	alexidine	-0.161	4	-0.314	1	1	25
1039	monensin	-0.263	6	-0.314	1	1	33
1040	terbutaline	0.139	4	0.313	1	1	25
1041	pralidoxime	0.1	4	0.313	1	1	25
1042	Prestwick-967	0.166	4	0.313	1	1	25
1043	famprofazone	-0.193	6	-0.312	1	1	33
1044	pentolonium	-0.054	5	-0.312	1	1	20
1045	nafcillin	-0.004	4	-0.312	1	1	25
1046	ethaverine	0.026	4	0.311	1	1	25
1047	nialamide	0.086	4	-0.311	1	1	0
1048	BCB000040	0.122	4	0.311	1	1	25
1049	homatropine	0.074	5	0.31	1	1	20
1050	naltrexone	0.059	5	-0.31	1	1	0
1051	epitiostanol	-0.004	4	-0.31	1	1	25
1052	mafenide	0.176	5	0.31	1	1	40
1053	kinetin	-0.031	4	0.31	1	1	25
1054	diethylcarbamazine	-0.019	4	0.309	1	1	25
1055	nadide	0	4	0.306	1	1	0
1056	metampicillin	0.043	5	0.306	1	1	20
1057	daunorubicin	-0.008	4	0.306	1	1	25
1058	phenacetin	0.122	4	0.306	1	1	25
1059	dexamethasone	-0.148	8	-0.306	1	1	37
1060	acetylsalicylsalicylic acid	0.026	4	0.305	1	1	25
1061	L-methionine sulfoximine	-0.038	4	0.305	1	1	25
1062	clobetasol	-0.166	3	-0.305	1	1	33
1063	chlorhexidine	-0.184	5	0.304	1	1	0
1064	PHA-00745360	-0.115	8	-0.304	1	1	37
1065	demecarium bromide	0.117	4	0.304	1	1	25
1066	dehydrocholic acid	0.152	5	0.303	1	1	40
1067	gossypol	-0.232	6	-0.303	1	1	33
1068	bromopride	-0.084	6	-0.303	1	1	33
1069	lovastatin	-0.125	4	-0.302	1	1	25
1070	imidurea	-0.026	3	0.302	1	1	33
1071	prazosin	0.052	6	0.302	1	1	16
1072	mephentermine	-0.068	5	-0.301	1	1	40
1073	ticarcillin	-0.09	3	-0.301	1	1	33
1074	heliotrine	-0.157	6	-0.3	1	1	33
1075	ramipril	0	4	0.3	1	1	0
1076	isoflupredone	-0.229	3	-0.3	1	1	33
1077	ginkgolide A	-0.007	4	-0.3	1	1	25
1078	trioxysalen	0.185	4	0.298	1	1	25
1079	ethosuximide	0.112	4	0.297	1	1	25
1080	pirinixic acid	0.104	5	0.297	1	1	20
1081	alpha-yohimbine	-0.114	3	-0.296	1	1	33
1082	santonin	0.148	4	0.296	1	1	25
1083	zidovudine	-0.005	4	0.296	1	1	25
1084	lynestrenol	0.005	5	0.296	1	1	20
1085	nicotinic acid	0.11	4	0.295	1	1	25
1086	digoxin	-0.022	4	0.294	1	1	25
1087	papaverine	0.086	4	0.294	1	1	25
1088	ketoprofen	0.118	6	0.294	1	1	33
1089	hyoscyamine	0.172	5	0.294	1	1	40
1090	flurbiprofen	-0.097	5	-0.294	1	1	20
1091	naphazoline	-0.194	5	-0.293	1	1	40
1092	cotinine	0.149	6	0.293	1	1	33
1093	prochlorperazine	-0.204	16	-0.293	1	1	43
1094	withaferin A	-0.153	4	-0.292	1	1	25
1095	raloxifene	-0.169	7	-0.291	1	1	28
1096	flucytosine	0	4	0.291	1	1	0
1097	sulfanilamide	-0.045	4	-0.291	1	1	25
1098	hydrochlorothiazide	0.076	5	0.291	1	1	20
1099	karakoline	-0.065	6	-0.291	1	1	16
1100	dequalinium chloride	0.024	4	0.291	1	1	25
1101	methanthelinium bromide	-0.067	4	0.29	1	1	25
1102	rottlerin	-0.145	3	-0.289	1	1	33
1103	N-acetyl-L-aspartic acid	-0.041	4	0.289	1	1	25
1104	benzthiazide	0.09	4	0.289	1	1	25
1105	perhexiline	-0.14	4	-0.289	1	1	25
1106	pipenzolate bromide	-0.002	4	-0.288	1	1	25
1107	alfaxalone	0.019	3	0.288	1	1	33
1108	cinchonine	0.14	4	0.288	1	1	25
1109	pinacidil	-0.058	4	-0.288	1	1	25
1110	isoxicam	-0.143	5	0.287	1	1	20
1111	midodrine	-0.073	5	-0.287	1	1	40
1112	enoxacin	0.08	4	0.287	1	1	25
1113	alprenolol	0.12	4	-0.286	1	1	0
1114	Prestwick-864	-0.016	4	-0.286	1	1	25
1115	sulindac	-0.057	7	0.285	1	1	14
1116	bezafibrate	0.136	4	0.285	1	1	25
1117	(-)-MK-801	0.066	4	0.285	1	1	25
1118	dinoprostone	-0.041	4	0.285	1	1	25
1119	betazole	0.069	5	0.285	1	1	20
1120	citiolone	-0.09	6	-0.284	1	1	33
1121	tracazolate	-0.187	4	-0.284	1	1	25
1122	pramocaine	-0.057	5	-0.283	1	1	20
1123	C-75	-0.006	4	0.282	1	1	25
1124	terazosin	-0.112	4	-0.281	1	1	25
1125	denatonium benzoate	0.155	4	0.281	1	1	25
1126	bendroflumethiazide	0.172	6	0.28	1	1	33
1127	desipramine	-0.136	4	-0.28	1	1	25
1128	xylometazoline	0.006	4	-0.279	1	1	25
1129	bacitracin	0.004	3	-0.279	1	1	33
1130	PHA-00851261E	0.101	8	0.279	1	1	37
1131	scopolamine N-oxide	0.075	5	0.279	1	1	20
1132	resveratrol	-0.226	9	-0.279	1	1	44
1133	sulfafurazole	0.015	5	0.279	1	1	40
1134	metformin	-0.01	10	0.278	1	1	20
1135	adiphenine	-0.197	5	-0.277	1	1	40
1136	indoprofen	-0.112	4	0.277	1	1	0
1137	0317956-0000	0.007	8	0.277	1	1	37
1138	methylprednisolone	0.129	4	0.277	1	1	25
1139	metronidazole	0	5	-0.276	1	1	20
1140	puromycin	-0.038	4	0.274	1	1	25
1141	15(S)-15-methylprostaglandin E2	-0.119	4	-0.274	1	1	25
1142	dantrolene	0.108	6	0.274	1	1	33
1143	N-acetylmuramic acid	-0.109	4	0.274	1	1	25
1144	naringenin	-0.027	4	0.273	1	1	25
1145	helveticoside	-0.169	6	-0.273	1	1	33
1146	boldine	0.091	4	0.273	1	1	25
1147	merbromin	0.052	5	0.273	1	1	40
1148	conessine	-0.088	4	-0.272	1	1	25
1149	saquinavir	-0.121	4	-0.271	1	1	25
1150	phenazone	0	3	0.271	1	1	0
1151	roxarsone	0.119	4	0.271	1	1	25
1152	tolnaftate	-0.075	5	-0.271	1	1	40
1153	levcycloserine	0.135	4	0.271	1	1	25
1154	guaifenesin	-0.046	6	-0.27	1	1	33
1155	sulfaphenazole	0.131	4	0.27	1	1	25
1156	adenosine phosphate	-0.034	4	0.269	1	1	25
1157	carbinoxamine	-0.12	4	-0.269	1	1	25
1158	sulfadoxine	-0.023	3	0.268	1	1	33
1159	cefotiam	-0.001	4	0.268	1	1	25
1160	terguride	-0.043	8	-0.268	1	1	12
1161	CAY-10397	-0.016	3	0.267	1	1	33
1162	cinchocaine	0.062	5	0.267	1	1	40
1163	caffeic acid	-0.012	3	-0.267	1	1	33
1164	artemisinin	-0.04	3	0.267	1	1	33
1165	homosalate	0.117	4	0.266	1	1	25
1166	lansoprazole	0.042	4	0.265	1	1	25
1167	Prestwick-1100	0.104	4	0.265	1	1	25
1168	chlorpropamide	0.039	6	0.264	1	1	33
1169	0179445-0000	0.012	8	0.264	1	1	25
1170	carmustine	-0.024	3	0.264	1	1	33
1171	alimemazine	-0.124	4	-0.264	1	1	25
1172	ampyrone	0.088	5	0.263	1	1	20
1173	eucatropine	0.14	6	0.263	1	1	33
1174	diflunisal	0.046	5	0.262	1	1	40
1175	promazine	-0.026	6	0.262	1	1	33
1176	naringin	0.138	4	0.261	1	1	25
1177	dicoumarol	0.089	6	0.261	1	1	33
1178	seneciphylline	-0.068	4	0.261	1	1	25
1179	5248896	-0.176	2	0.26	1	1	0
1180	gliquidone	-0.036	4	0.26	1	1	25
1181	danazol	-0.114	4	-0.26	1	1	25
1182	ribavirin	-0.047	4	0.259	1	1	25
1183	finasteride	-0.093	6	-0.258	1	1	33
1184	methylergometrine	-0.021	4	-0.258	1	1	25
1185	oxolinic acid	-0.004	5	0.258	1	1	40
1186	Prestwick-984	0.001	4	0.258	1	1	25
1187	promethazine	-0.051	4	-0.258	1	1	25
1188	PF-00562151-00	-0.164	8	-0.257	1	1	37
1189	vancomycin	-0.112	4	-0.257	1	1	25
1190	benzbromarone	-0.034	3	0.257	1	1	33
1191	dicloxacillin	-0.111	4	-0.257	1	1	25
1192	hesperetin	-0.026	5	-0.256	1	1	20
1193	captopril	0.088	5	0.255	1	1	40
1194	tiratricol	-0.127	4	-0.255	1	1	25
1195	doxylamine	0.067	5	0.255	1	1	40
1196	fulvestrant	0.014	40	0.255	1	1	22
1197	Gly-His-Lys	-0.151	3	-0.255	1	1	33
1198	budesonide	-0.026	4	-0.254	1	1	25
1199	profenamine	-0.167	4	-0.254	1	1	25
1200	amiodarone	-0.202	5	-0.254	1	1	40
1201	indometacin	0.035	8	0.253	1	1	37
1202	cimetidine	-0.011	5	-0.253	1	1	20
1203	sulfabenzamide	-0.028	4	-0.252	1	1	25
1204	thiethylperazine	0.01	4	0.252	1	1	25
1205	3-hydroxy-DL-kynurenine	0.011	6	0.251	1	1	16
1206	esculetin	-0.037	3	0.251	1	1	33
1207	Prestwick-857	-0.139	4	-0.25	1	1	25
1208	bumetanide	0.009	4	0.249	1	1	25
1209	estradiol	-0.163	37	-0.249	1	1	37
1210	rimexolone	0.109	4	0.249	1	1	25
1211	cefepime	-0.006	4	0.248	1	1	25
1212	naproxen	0.019	9	0.248	1	1	22
1213	clorsulon	-0.024	4	0.247	1	1	25
1214	colforsin	0.075	5	0.246	1	1	20
1215	nordihydroguaiaretic acid	-0.025	15	-0.246	1	1	6
1216	meglumine	0.012	4	-0.244	1	1	25
1217	lidoflazine	-0.157	3	0.244	1	1	0
1218	nicergoline	-0.206	5	-0.243	1	1	40
1219	6-benzylaminopurine	0.059	5	0.243	1	1	40
1220	nifenazone	-0.105	5	0.242	1	1	20
1221	gramine	0.035	4	0.241	1	1	25
1222	SR-95639A	0.027	4	0.241	1	1	25
1223	cicloheximide	0.022	4	-0.241	1	1	25
1224	ornidazole	-0.019	5	0.241	1	1	20
1225	celecoxib	-0.121	5	-0.24	1	1	40
1226	pheniramine	0.01	5	0.238	1	1	40
1227	chlorphenesin	0.007	4	0.237	1	1	25
1228	PHA-00767505E	0.01	4	-0.237	1	1	25
1229	lanatoside C	-0.064	6	0.237	1	1	16
1230	amantadine	0.02	4	0.236	1	1	25
1231	kanamycin	-0.135	4	-0.236	1	1	25
1232	(+)-isoprenaline	0.015	4	0.235	1	1	25
1233	oxedrine	-0.114	4	0.234	1	1	0
1234	meprylcaine	-0.014	4	-0.233	1	1	25
1235	memantine	-0.016	4	0.233	1	1	25
1236	pirlindole	-0.16	3	-0.232	1	1	33
1237	ethionamide	0.013	3	0.232	1	1	33
1238	prenylamine	-0.158	4	0.232	1	1	0
1239	nifedipine	-0.132	7	-0.229	1	1	28
1240	nifuroxazide	0.024	4	0.229	1	1	25
1241	noscapine	-0.038	4	-0.229	1	1	25
1242	alverine	0.043	4	0.228	1	1	25
1243	chlorphenamine	-0.066	4	-0.227	1	1	25
1244	cyclopentolate	-0.008	4	0.227	1	1	25
1245	cefoxitin	-0.041	4	-0.225	1	1	25
1246	tetracycline	0.008	5	0.225	1	1	20
1247	suprofen	-0.071	4	-0.224	1	1	25
1248	Prestwick-664	0.037	6	-0.224	1	1	16
1249	tamoxifen	-0.147	7	-0.223	1	1	42
1250	dihydroergocristine	-0.17	4	0.222	1	1	0
1251	PF-00875133-00	-0.004	3	0.222	1	1	33
1252	ciclacillin	-0.003	4	0.222	1	1	25
1253	oxamniquine	0.022	4	0.222	1	1	25
1254	haloperidol	-0.194	32	-0.222	1	1	40
1255	sulfasalazine	-0.105	5	-0.221	1	1	40
1256	amphotericin B	-0.02	4	0.221	1	1	25
1257	PNU-0230031	-0.098	8	-0.221	1	1	37
1258	sulfamerazine	0.053	5	0.22	1	1	40
1259	ricinine	-0.038	4	0.22	1	1	25
1260	meclozine	-0.024	5	0.219	1	1	20
1261	BCB000038	-0.045	4	-0.219	1	1	25
1262	trifluoperazine	-0.189	16	-0.219	1	1	37
1263	4-hydroxyphenazone	0.011	5	0.216	1	1	20
1264	alpha-estradiol	-0.039	16	-0.215	1	1	25
1265	Prestwick-983	-0.025	3	0.215	1	1	33
1266	solanine	0.004	4	0.215	1	1	25
1267	erythromycin	-0.051	5	-0.215	1	1	40
1268	STOCK1N-28457	-0.019	3	-0.215	1	1	33
1269	SC-19220	-0.077	4	-0.214	1	1	25
1270	acetylsalicylic acid	-0.046	13	-0.213	1	1	23
1271	minaprine	0.055	5	-0.212	1	1	20
1272	ethotoin	0.042	6	0.211	1	1	33
1273	rofecoxib	0.035	6	0.209	1	1	33
1274	3-acetamidocoumarin	0.015	4	0.209	1	1	25
1275	15-delta prostaglandin J2	-0.121	15	0.209	1	1	6
1276	cinoxacin	-0.011	4	-0.208	1	1	25
1277	PNU-0293363	-0.066	3	-0.206	1	1	33
1278	betamethasone	-0.054	3	-0.205	1	1	33
1279	clozapine	-0.194	17	-0.205	1	1	41
1280	practolol	-0.081	4	-0.204	1	1	25
1281	methylbenzethonium chloride	-0.098	6	-0.204	1	1	33
1282	phenformin	-0.119	7	-0.203	1	1	42
1283	dipyridamole	-0.137	6	0.202	1	1	16
1284	guanadrel	0.027	5	0.2	1	1	20
1285	rosiglitazone	-0.051	14	-0.199	1	1	28
1286	fenoprofen	-0.076	6	-0.198	1	1	33
1287	terconazole	-0.022	4	0.196	1	1	25
1288	genistein	-0.004	17	0.196	1	1	35
1289	mefenamic acid	-0.068	5	0.194	1	1	40
1290	thioridazine	-0.143	20	0.191	1	1	10
1291	lisinopril	-0.039	3	-0.191	1	1	33
1292	troglitazone	-0.136	16	-0.189	1	1	31
1293	acenocoumarol	-0.061	5	0.188	1	1	40
1294	metoclopramide	-0.093	6	0.187	1	1	16
1295	luteolin	-0.028	4	0.186	1	1	25
1296	novobiocin	-0.031	9	-0.183	1	1	11
1297	flutamide	-0.049	5	-0.183	1	1	20
1298	propantheline bromide	-0.032	4	0.183	1	1	25
1299	spiradoline	-0.039	4	0.182	1	1	25
1300	sodium phenylbutyrate	-0.098	7	-0.18	1	1	28
1301	bupropion	-0.011	4	0.178	1	1	25
1302	baclofen	-0.003	5	0.177	1	1	20
1303	tretinoin	0.007	22	0.173	1	1	27
1304	mefexamide	-0.046	4	-0.16	1	1	25
1305	spiramycin	-0.065	6	-0.148	1	1	33
1306	fluphenazine	-0.105	18	-0.143	1	1	27
1307	naloxone	-0.01	6	0.14	1	1	16
1308	chlorpromazine	-0.027	19	0.137	1	1	26
1309	valproic acid	0.064	57	0.133	1	1	28
